# Supplementary material
Source: PubMed Central journal article supplement (PMC8963770)
Supplement: mmc1.pdf [file mmc1.pdf]

# THE LANCET

## Rheumatology

### Supplementary appendix

This appendix formed part of the original submission and has been peer reviewed. We post it as supplied by the authors.

Supplement to: Pfeifer J, Thurner B, Kessel C, et al. Autoantibodies against interleukin-1 receptor antagonist in multisystem inflammatory syndrome in children: a multicentre, retrospective, cohort study. *Lancet Rheumatol* 2022; published online March 29. [https://doi.org/10.1016/S2665-9913\(22\)00064-9](https://doi.org/10.1016/S2665-9913(22)00064-9).

**Appendix**  
**Supplementary Table 1: Patient characteristics**

| Patient number | Gender (m/f) | Age range [years] | Weight [kg] | Height [cm] | Ethnicity     | Onset after Covid-infection [weeks]            | Fever > 3d | Rash | Bilateral conjunctivitis | Hypotension | Cardiac affection | Ascites | Pleural effusion | Gastrointestinal symptoms | IVIg   | ASS | Glucocorticoids        | ventilation | catecholamines | Duration of hospitalization[days] |
|----------------|--------------|-------------------|-------------|-------------|---------------|------------------------------------------------|------------|------|--------------------------|-------------|-------------------|---------|------------------|---------------------------|--------|-----|------------------------|-------------|----------------|-----------------------------------|
| MIS-C-1        | f            | 6-10              | 30          | 133         | White         | 6                                              | +          | +    | +                        | +           | +                 | +       | +                | +                         | 4 g/kg | +   | 30mg/kg/d for 5 d<br>+ | NIV         | +              | 17                                |
| MIS-C-2        | f            | 6-10              | 46          | 139         | White         | 4                                              | +          | -    | -                        | -           | +                 | +       | +                | -                         | +      | +   | +                      | IV          | +              | 17                                |
| MIS-C-3        | f            | 0-5               | 15          | 110         | Asian         | 3                                              | +          | -    | -                        | +           | +                 | +       | +                | +                         | 2 g/kg | +   | 30 mg/kg/d for 3 d     | IV          | +              | 15                                |
| MIS-C-4        | f            | 11-15             | 28          | 141         | White         | at admission high IgG, virus in stool          | +          | +    | +                        | +           | +                 | +       | +                | +                         | 2g/kg  | +   | +                      | 2l/min      | +              | -                                 |
| MIS-C-5        | m            | 6-10              | 51          | 148         | White         | 5                                              | +          | +    | +                        | +           | -                 | -       | +                | +                         | 2g/kg  | +   | 20mg/kg for 3d<br>+    | +           | +              | -                                 |
| MIS-C-6        | m            | 6-10              | 25          | 135         | White         | 7                                              | +          | +    | +                        | +           | +                 | -       | +                | +                         | +      | +   | +                      | -           | -              |                                   |
| MIS-C-7        | m            | 16-18             | 70          | 175         | White         | acute COVID-19                                 | +          | -    | -                        | +           | -                 | -       | -                | -                         | -      | +   | +                      | NIV         | +              | 13                                |
| MIS-C-8        | f            | 0-5               | 9.8         | 81.5        | African       | unknown, at admission high IgG                 | +          | +    | -                        | +           | +                 | -       | +                | +                         | 2g/kg  | +   | 2mg/kg/d               | IV          | +              | 11                                |
| MIS-C-9        | f            | 11-15             | 71.8        | 166         | North African | unknown, at admission, high IgG                | +          | +    | -                        | +           | +                 | -       | -                | +                         | 2g/kg  | +   | 2mg/kg/d               | IV          | +              | 14                                |
| MIS-C-10       | m            | 0-5               | 13.6        | 88          | White         | unknown, at admission high IgG, virus in stool | +          | +    | +                        | -           | -                 | -       | -                | +                         | 2g/kg  | +   | 30mg/kg/d 3 days       | -           | -              | 6                                 |
| MIS-C-11       | m            | 0-5               | 16.5        |             | White         | unknown, at admission high                     | +          | +    | +                        | -           | -                 | -       | -                | +                         | 2g/kg  | +   | not necessary          | -           | -              | 5                                 |

|          |   |       |      |     |                  |                          |   |   |   |   |   |   |   |   |             |   |                                                |   |   |    |
|----------|---|-------|------|-----|------------------|--------------------------|---|---|---|---|---|---|---|---|-------------|---|------------------------------------------------|---|---|----|
| MIS-C-12 | m | 0-5   | 15.6 | 102 | White            | IgG<br>5                 | + | - | + | - | - | + | + | + | 2x<br>2g/kg | - | Prednisolon<br>2mg/kg/d<br>5d, then<br>tapered | - | - | 14 |
| MIS-C-13 | f | 0-5   | 11   | 76  | Latin            | contact with<br>COVID-19 | + | + | + | - | + | - | - | - | 2g/kg       | + | 30mg/kg/d 3<br>days                            | - | - | 6  |
| MIS-C-14 | f | 6-10  | 33   | 134 | Latin            | no information           | + | - | + | - | + | - | - | + | +           | + | +                                              | - | - | 5  |
| MIS-C-15 | m | 6-10  | 24   | 118 | White            | 8                        | + | + | + | + | - | - | - | + | +           | + | +                                              | - | - | 6  |
| MIS-C-16 | f | 0-5   | 22   | 107 | Latin            | no information           | + | + | + | - | - | - | - | + | +           | + | +                                              | - | - | 6  |
| MIS-C-17 | f | 6-10  | 25   | 120 | White            | 4                        | + | + | + | - | - | - | - | + | +           | + | +                                              | - | - | 5  |
| MIS-C-18 | m | 16-18 | 57   |     | North<br>African | no information           | + | + | + | + | + | + | - | + | +           | + | +                                              | + | + | 12 |
| MIS-C-19 | f | 11-15 | 55   | 156 | White            | 9                        | + | - | - | - | - | - | - | + | +           | + | +                                              | - | - | 6  |
| MIS-C-20 | m | 6-10  | 27   | 139 | Asian            | no information           | + | - | + | + | + | - | - | + | -           | - | +                                              | - | + | 12 |
| MIS-C-21 | m | 0-5   | 17   | 109 | White            | no information           | + | + | + | + | - | - | - | + | +           | + | +                                              | - | - | 6  |

**Supplementary table 2: Clinical and laboratory summary of patients with available clinical information**

|                                          | MIS-C-1         | MIS-C-2         | MIS-C-3         | MIS-C-4          | MIS-C-5         | MIS-C-6         | MIS-C-7         | MIS-C-8          | MIS-C-9          | MIS-C-10                            | MIS-C-11 | MIS-C-12        | MIS-C-13         |
|------------------------------------------|-----------------|-----------------|-----------------|------------------|-----------------|-----------------|-----------------|------------------|------------------|-------------------------------------|----------|-----------------|------------------|
| Leucocytes [ / $\mu$ l]<br>Nadir<br>peak | 3,400<br>26,200 | 4,400<br>14,400 | 9,000<br>20,600 | 16,190<br>30,160 | 5,590<br>17,750 | 8,080<br>19,020 | 8,000<br>13,600 | 23,200<br>30,600 | 10,700<br>14,000 | 4,600<br>12,000                     | 18,500   | 6,770<br>24,000 | 11,800<br>29,300 |
| Thrombocytes nadir [ / $\mu$ l]          | 78,000          | 123,000         | 218,000         | 776,000          | 1,248,000       | 111,000         | 97,000          | 107,000          | 163,000          | 114,000                             | 296,000  | 100,000         | 444,000          |
| CrP peak [mg/l]                          | 205             | 197             | 260             | 118              | 265             | 207             | 356             | 213.5            | 364.5            | 73.5                                | 165      | 80.64           | 184.2            |
| PCT peak [ng/ml]                         | 63.2            | 3.9             | 9.83            | 11.25            | 20.34           | 35.62           | 8.09            | 4.65             | 6.79             | 3.64                                | 6.7      | n.d.            | 0.57             |
| NT-pro-BNP peak [pg/ml]                  | 52,003          | 8,293           | 69,020          | 35,000           | >35,000         | 17,183          | 2,414           | 4,840            | 13,816           | 5,810                               | 7,994    | n.d.            | 1,416            |
| Troponin T peak [pg/ml]                  | 45              | 48              | 176             | 110              | 41.8            | 101             | ND              | 70               | 113              | ND                                  | ND       | n.d.            | 10               |
| Ferritin [ng/ml]                         | 542             | 2,544           | 990             | 1,561            | 1,039           | 3,937           | 1,952           | 563              | 977              | 358                                 | 67       | n.d.            | 113              |
| Na <sup>+</sup> nadir [mmol/l]           | 129             | 130             |                 | 125              | 124             | 127             | 141             | 134              | 136              | 132                                 | 136      | 129             | 136              |
| Albumine nadir [mg/l]                    | 26              | 22              |                 | 22               | 21              | 26              | 24              | 20               | 33               | 29                                  | 35       | 23,8            | 32               |
| SARS-Cov 2 Serology                      | IgG +<br>IgA +  | IgG +<br>IgA +  | IgG +           | IgG+<br>IgA+     | IgG+            | IgG+            | ND              | IgG +<br>IgM ND  | IgG +<br>IgM -   | IgG +<br>IgM neg                    | IgG +    | IgG +           | neg              |
| SARS-CoV2 PCR at hospitalization         | neg             | neg             | neg             | neg              | neg             | ?               | pos             | pos              | pos              | neg<br>(nasopharynx)<br>pos (stool) | neg      | neg.            | neg              |
| D-Dimer peak                             | 4.56            | 8.19            | 7.68            | 3.83             | 6.87            | 5.08            | 7.23            | 8.75             | 6.32             | ND                                  | ND       | 7.04            | ND               |
| Anti-IL-1-Ra-Ab                          | pos             | pos             | pos             | pos              | pos             | pos             | neg             | neg              | pos              | pos                                 | pos      | neg             | pos              |



**Continuation of supplementary table 2: Clinical and laboratory summary of patients with available clinical information**

|                                                  | MIS-C-14        | MIS-C-15             | MIS-C-16        | MIS-C-17        | MIS-C-18         | MIS-C-19             | MIS-C-20        | MIS-C-21                      |
|--------------------------------------------------|-----------------|----------------------|-----------------|-----------------|------------------|----------------------|-----------------|-------------------------------|
| Leucocytes [ / $\mu$ l]<br>Nadir<br>peak         | 5.900<br>12.000 | 8.200<br>21.400      | 9.300<br>10.300 | 6.600<br>10.800 | 15.300<br>29.300 | 5.300<br>13.300      | 7.900<br>11.400 | 9.700<br>11.700               |
| Thrombocytes nadir [ / $\mu$ l]                  | 226.000         | 145.000              | 151.000         | 105.000         | 98.000           | 218.000              | 256.000         | 161.000                       |
| CrP peak [mg/l]                                  | 429             | 139                  | 259             | 130             | 440              | 309                  | 299.4           | 235                           |
| PCT peak [ng/ml]                                 | 0.91            | 1.1                  | 12.66           | 3.7             | 52.6             | 3.68                 | 11.69           | 6.59                          |
| NT-pro-BNP peak [pg/ml]                          | 5.281           | 5.653                | 3.832           | 2.260           | 75.718           | 42                   | --              | 6.244                         |
| Troponin T peak [pg/ml]                          | 0.153           |                      | 0.09            | 0.02            | 1.186            |                      | 0.129           | 0.034                         |
| Ferritin [ng/ml]                                 | 400             | 572                  | 567             | 460             | 40006            | 282                  | 269             | 320                           |
| Na <sup>+</sup> nadir [mmol/l]                   | 141             | 133                  | 126             | 133             | 136              | 138                  | 134             | 132                           |
| Albumine nadir [mg/l]                            | 30              | 28                   | 31              | 28              | 20               | 40                   | 36              | 28                            |
| SARS-Cov 2 Serology                              | IgM –<br>IgG +  | IgM +<br>IgG +       | IgM-<br>IgG+    | IgM +<br>IgG +  | IgM +<br>IgG +   | IgM –<br>IgG +       | IgM +<br>IgG +  | IgM +<br>IgG +                |
| SARS-CoV2 PCR at hospitalization                 | Pos             | Neg                  | Neg             | Neg             | Neg              | Neg                  | Neg             | Neg                           |
| D-Dimer peak                                     | 1.81            | 2.37                 | 38.08           | 2.43            | 12.49            | 4.48                 | 4.96            | 4.67                          |
| Anti-IL-1-Ra-Ab (yes/no; max. titer, Ig-class)   | neg             | pos<br>1:200<br>IgG1 | neg             | neg             | neg              | pos<br>1:400<br>IgG1 | neg             | Pos<br>1:400<br>IgM &<br>IgG1 |
| Hyperphosphorylated IL-1-Ra                      | neg             | pos                  | neg             | neg             | neg              | pos                  | neg             | pos                           |
| Min. plasma IL-1-Ra (pg/ml); determined by ELISA | 1555            | 227.5                | 1663            | 1923            | 1592             | 221                  | 1625            | 182                           |
| Anti-PGRN-Ab (yes/no; Titer, Ig-class)           | neg             | neg                  | neg             | neg             | neg              | pos<br>1:200         | neg             | neg                           |

**Supplementary Table 3: Characteristics of samples of CoKiBa trials**

| <b>CoKiBa #</b> | <b>sex (f/m)</b> | <b>age (years)</b> | <b>SARS-CoV-2 ELISA (pos/neg)</b> | <b>Anti-IL-1Ra-Ab (pos/neg)</b> | <b>Anti-PGRN-Ab (pos/neg)</b> |
|-----------------|------------------|--------------------|-----------------------------------|---------------------------------|-------------------------------|
| 1               | m                | 3                  | neg                               | neg                             | neg                           |
| 2               | f                | 8                  | neg                               | neg                             | neg                           |
| 3               | m                | 12                 | neg                               | neg                             | neg                           |
| 4               | m                | 13                 | neg                               | neg                             | neg                           |
| 5               | f                | 13                 | neg                               | neg                             | neg                           |
| 6               | f                | 11                 | neg                               | neg                             | neg                           |
| 7               | m                | 8                  | neg                               | neg                             | neg                           |
| 8               | m                | 12                 | neg                               | neg                             | neg                           |
| 9               | f                | 5                  | neg                               | neg                             | neg                           |
| 10              | f                | 1                  | neg                               | neg                             | neg                           |
| 11              | f                | 10                 | pos                               | neg                             | neg                           |
| 12              | m                | 3                  | pos                               | neg                             | neg                           |
| 13              | m                | 13                 | neg                               | neg                             | neg                           |
| 14              | f                | 10                 | pos                               | neg                             | neg                           |
| 15              | m                | 1                  | neg                               | neg                             | neg                           |
| 16              | f                | 6                  | neg                               | neg                             | neg                           |
| 17              | m                | 8                  | neg                               | neg                             | neg                           |
| 18              | m                | 2                  | neg                               | neg                             | neg                           |
| 19              | f                | 0                  | neg                               | neg                             | neg                           |
| 20              | m                | 10                 | neg                               | neg                             | neg                           |
| 21              | m                | 1                  | neg                               | neg                             | neg                           |
| 22              | f                | 13                 | neg                               | neg                             | neg                           |
| 23              | f                | 4                  | neg                               | neg                             | neg                           |
| 24              | m                | 1                  | neg                               | neg                             | neg                           |
| 25              | f                | 11                 | neg                               | neg                             | neg                           |
| 26              | f                | 13                 | pos                               | neg                             | neg                           |
| 27              | m                | 13                 | neg                               | neg                             | neg                           |
| 28              | m                | 13                 | neg                               | neg                             | neg                           |
| 29              | f                | 8                  | neg                               | neg                             | neg                           |
| 30              | m                | 12                 | pos                               | neg                             | neg                           |
| 31              | m                | 11                 | pos                               | neg                             | neg                           |
| 32              | f                | 5                  | neg                               | neg                             | neg                           |
| 33              | m                | 12                 | neg                               | neg                             | neg                           |
| 34              | f                | 0                  | pos                               | neg                             | neg                           |
| 35              | m                | 13                 | neg                               | neg                             | neg                           |
| 36              | m                | 8                  | pos                               | neg                             | neg                           |
| 37              | m                | 8                  | neg                               | neg                             | neg                           |
| 38              | f                | 8                  | neg                               | neg                             | neg                           |
| 39              | m                | 12                 | neg                               | neg                             | neg                           |
| 40              | f                | 1                  | neg                               | neg                             | neg                           |
| 41              | f                | 10                 | pos                               | neg                             | neg                           |
| 42              | f                | 10                 | neg                               | neg                             | neg                           |
| 43              | f                | 11                 | neg                               | neg                             | neg                           |

|    |   |    |     |     |     |
|----|---|----|-----|-----|-----|
| 44 | f | 11 | pos | neg | neg |
| 45 | m | 12 | pos | neg | neg |
| 46 | m | 13 | pos | neg | neg |
| 47 | m | 2  | neg | neg | neg |
| 48 | f | 5  | neg | neg | neg |
| 49 | m | 8  | neg | neg | neg |
| 50 | f | 11 | pos | neg | neg |
| 51 | m | 10 | neg | neg | neg |
| 52 | m | 7  | neg | neg | neg |
| 53 | f | 12 | neg | neg | neg |
| 54 | f | 7  | neg | neg | neg |
| 55 | m | 3  | neg | neg | neg |
| 56 | f | 7  | neg | neg | neg |
| 57 | f | 5  | neg | neg | neg |
| 58 | m | 6  | neg | neg | neg |
| 59 | m | 10 | neg | neg | neg |
| 60 | m | 12 | neg | neg | neg |
| 61 | m | 9  | neg | neg | neg |
| 62 | f | 6  | pos | neg | neg |
| 63 | m | 6  | neg | neg | neg |
| 64 | m | 7  | neg | neg | neg |
| 65 | f | 5  | neg | neg | neg |
| 66 | m | 6  | pos | neg | neg |
| 67 | f | 10 | neg | neg | neg |
| 68 | f | 9  | neg | neg | neg |
| 69 | f | 3  | neg | neg | neg |
| 70 | m | 10 | neg | neg | neg |
| 71 | m | 12 | neg | neg | neg |
| 72 | m | 6  | neg | neg | neg |
| 73 | m | 12 | neg | neg | neg |
| 74 | f | 6  | neg | neg | neg |
| 75 | m | 2  | pos | neg | neg |
| 76 | f | 8  | neg | neg | neg |
| 77 | m | 6  | neg | neg | neg |
| 78 | f | 7  | neg | neg | neg |
| 79 | f | 12 | neg | neg | neg |
| 80 | m | 4  | neg | neg | neg |
| 81 | m | 11 | neg | neg | neg |
| 82 | f | 10 | neg | neg | neg |
| 83 | m | 8  | neg | neg | neg |
| 84 | m | 13 | pos | neg | neg |
| 85 | f | 16 | neg | neg | neg |
| 86 | m | 3  | neg | neg | neg |
| 87 | f | 12 | neg | neg | neg |
| 88 | f | 3  | neg | neg | neg |
| 89 | m | 2  | neg | neg | neg |
| 90 | m | 12 | neg | neg | neg |
| 91 | m | 8  | neg | neg | neg |
| 92 | f | 6  | neg | neg | neg |



|     |   |    |     |     |     |
|-----|---|----|-----|-----|-----|
| 93  | m | 2  | neg | neg | neg |
| 94  | f | 2  | neg | neg | neg |
| 95  | m | 13 | neg | neg | neg |
| 96  | m | 13 | pos | neg | neg |
| 97  | f | 3  | neg | neg | neg |
| 98  | m | 3  | neg | neg | neg |
| 99  | f | 2  | neg | neg | neg |
| 100 | f | 11 | neg | neg | neg |
| 101 | f | 8  | neg | neg | neg |
| 102 | m | 12 | pos | neg | neg |
| 103 | m | 7  | pos | neg | neg |
| 104 | f | 10 | pos | neg | neg |
| 105 | m | 3  | neg | neg | neg |
| 106 | f | 15 | pos | neg | neg |
| 107 | m | 9  | pos | neg | neg |
| 108 | m | 7  | pos | neg | neg |
| 109 | m | 1  | neg | neg | neg |
| 110 | m | 8  | neg | neg | neg |
| 111 | m | 13 | neg | neg | neg |
| 112 | f | 9  | neg | neg | neg |
| 113 | f | 13 | neg | neg | neg |
| 114 | f | 3  | neg | neg | neg |
| 115 | m | 13 | neg | neg | neg |
| 116 | m | 12 | neg | neg | neg |
| 117 | m | 10 | neg | neg | neg |
| 118 | f | 6  | neg | neg | neg |
| 119 | f | 5  | pos | neg | neg |
| 120 | f | 13 | neg | neg | neg |
| 121 | m | 12 | neg | neg | neg |
| 122 | m | 10 | neg | neg | neg |
| 123 | f | 3  | neg | neg | neg |
| 124 | m | 0  | pos | neg | neg |
| 125 | f | 2  | neg | neg | neg |
| 126 | f | 8  | pos | neg | neg |
| 127 | m | 2  | neg | neg | neg |
| 128 | m | 13 | neg | neg | neg |
| 129 | f | 2  | neg | neg | neg |
| 130 | f | 6  | pos | neg | neg |
| 131 | m | 7  | neg | neg | neg |
| 132 | m | 1  | pos | neg | neg |
| 133 | f | 4  | pos | neg | neg |
| 134 | f | 6  | pos | neg | neg |
| 135 | m | 2  | neg | neg | neg |
| 136 | m | 3  | pos | neg | neg |
| 137 | f | 2  | neg | neg | neg |
| 138 | f | 7  | neg | neg | neg |
| 139 | m | 10 | pos | neg | neg |
| 140 | m | 13 | neg | neg | neg |
| 141 | f | 3  | pos | neg | neg |

|     |   |    |     |     |     |
|-----|---|----|-----|-----|-----|
| 142 | f | 12 | neg | neg | neg |
| 143 | f | 9  | neg | neg | neg |
| 144 | f | 5  | neg | neg | neg |
| 145 | f | 5  | pos | neg | neg |
| 146 | f | 5  | neg | neg | neg |
| 147 | m | 1  | neg | neg | neg |
| 148 | m | 11 | neg | neg | neg |
| 149 | f | 1  | neg | neg | neg |
| 150 | m | 2  | neg | neg | neg |
| 151 | f | 13 | neg | neg | neg |
| 152 | f | 5  | neg | neg | neg |
| 153 | m | 8  | neg | neg | neg |
| 154 | f | 12 | neg | neg | neg |
| 155 | f | 4  | neg | neg | neg |
| 156 | m | 5  | neg | neg | neg |
| 157 | m | 2  | pos | neg | neg |
| 158 | f | 6  | neg | neg | neg |
| 159 | m | 2  | pos | neg | neg |
| 160 | m | 14 | neg | neg | neg |
| 161 | f | 0  | neg | neg | neg |
| 162 | m | 13 | neg | neg | neg |
| 163 | f | 5  | neg | neg | neg |
| 164 | f | 6  | neg | neg | neg |
| 165 | f | 13 | neg | neg | neg |
| 166 | f | 8  | neg | neg | neg |
| 167 | m | 6  | neg | neg | neg |
| 168 | f | 10 | neg | neg | neg |
| 169 | m | 15 | neg | neg | neg |
| 170 | f | 10 | neg | neg | neg |
| 171 | m | 0  | neg | neg | neg |
| 172 | m | 12 | neg | neg | neg |
| 173 | f | 10 | neg | neg | neg |
| 174 | m | 10 | neg | neg | neg |
| 175 | m | 2  | neg | neg | neg |
| 176 | f | 8  | neg | neg | neg |
| 177 | m | 12 | neg | neg | neg |
| 178 | f | 10 | neg | neg | neg |
| 179 | m | 13 | neg | neg | neg |
| 180 | m | 8  | neg | neg | neg |
| 181 | f | 12 | neg | neg | neg |
| 182 | m | 7  | neg | neg | neg |
| 183 | m | 7  | neg | neg | neg |
| 184 | m | 6  | neg | neg | neg |
| 185 | m | 11 | neg | neg | neg |
| 186 | f | 7  | pos | neg | neg |
| 187 | m | 1  | neg | neg | neg |
| 188 | m | 5  | neg | neg | neg |
| 189 | m | 13 | pos | neg | neg |
| 190 | f | 4  | neg | neg | neg |

|     |   |    |     |     |     |
|-----|---|----|-----|-----|-----|
| 191 | f | 3  | neg | neg | neg |
| 192 | f | 5  | neg | neg | neg |
| 193 | f | 6  | neg | neg | neg |
| 194 | f | 4  | neg | neg | neg |
| 195 | m | 1  | neg | neg | neg |
| 196 | f | 11 | neg | neg | neg |
| 197 | f | 6  | neg | neg | neg |
| 198 | f | 9  | neg | neg | neg |
| 199 | f | 12 | pos | neg | neg |
| 200 | m | 7  | neg | neg | neg |
| 201 | m | 12 | neg | neg | neg |
| 202 | m | 1  | neg | neg | neg |
| 203 | m | 7  | neg | neg | neg |
| 204 | m | 6  | neg | neg | neg |
| 205 | m | 9  | neg | neg | neg |
| 206 | f | 3  | neg | neg | neg |
| 207 | m | 9  | neg | neg | neg |
| 208 | m | 1  | neg | neg | neg |
| 209 | m | 3  | neg | neg | neg |
| 210 | m | 13 | neg | neg | neg |
| 211 | m | 7  | pos | neg | neg |
| 212 | f | 16 | neg | neg | neg |
| 213 | m | 11 | neg | neg | neg |
| 214 | m | 13 | neg | neg | neg |
| 215 | f | 8  | neg | neg | neg |
| 216 | m | 3  | neg | neg | neg |
| 217 | m | 7  | pos | neg | neg |
| 218 | f | 6  | neg | neg | neg |
| 219 | f | 13 | pos | neg | neg |
| 220 | m | 13 | neg | neg | neg |
| 221 | f | 8  | pos | neg | neg |
| 222 | m | 12 | pos | neg | neg |
| 223 | f | 13 | neg | neg | neg |
| 224 | f | 10 | neg | neg | neg |
| 225 | f | 6  | neg | neg | neg |
| 226 | m | 3  | pos | neg | neg |
| 227 | m | 8  | neg | neg | neg |
| 228 | f | 11 | neg | neg | neg |
| 229 | f | 9  | pos | neg | neg |
| 230 | m | 11 | pos | neg | neg |
| 231 | f | 13 | pos | neg | neg |
| 232 | f | 11 | neg | neg | neg |
| 233 | m | 2  | pos | neg | neg |
| 234 | m | 13 | pos | neg | neg |
| 235 | f | 13 | neg | neg | neg |
| 236 | f | 6  | neg | neg | neg |
| 237 | f | 2  | pos | neg | neg |
| 238 | m | 12 | pos | neg | neg |
| 239 | m | 8  | pos | neg | neg |

|     |   |    |     |     |     |
|-----|---|----|-----|-----|-----|
| 240 | f | 11 | neg | neg | neg |
| 241 | f | 10 | pos | neg | neg |
| 242 | f | 12 | pos | neg | neg |
| 243 | f | 5  | neg | neg | neg |
| 244 | m | 8  | pos | neg | neg |
| 245 | m | 7  | pos | neg | neg |
| 246 | f | 5  | neg | neg | neg |
| 247 | m | 14 | neg | neg | neg |
| 248 | f | 2  | neg | neg | neg |
| 249 | f | 11 | neg | neg | neg |
| 250 | m | 3  | pos | neg | neg |
| 251 | f | 10 | neg | neg | neg |
| 252 | m | 3  | neg | neg | neg |
| 253 | m | 13 | neg | neg | neg |
| 254 | f | 11 | neg | neg | neg |
| 255 | m | 14 | neg | neg | neg |
| 256 | f | 5  | neg | neg | neg |
| 257 | f | 12 | neg | neg | neg |
| 258 | f | 8  | neg | neg | neg |
| 259 | m | 7  | pos | neg | neg |
| 260 | f | 5  | neg | neg | neg |
| 261 | f | 10 | neg | neg | neg |
| 262 | f | 5  | neg | neg | neg |
| 263 | f | 11 | neg | neg | neg |
| 264 | f | 6  | pos | neg | neg |
| 265 | f | 12 | pos | neg | neg |
| 266 | f | 5  | neg | neg | neg |
| 267 | m | 3  | pos | neg | neg |
| 268 | f | 3  | neg | neg | neg |
| 269 | f | 5  | neg | neg | neg |
| 270 | f | 5  | pos | neg | neg |
| 271 | m | 1  | pos | neg | neg |
| 272 | m | 1  | pos | neg | neg |
| 273 | f | 5  | pos | neg | neg |
| 274 | f | 3  | pos | neg | neg |
| 275 | f | 2  | pos | neg | neg |
| 276 | m | 13 | neg | neg | neg |
| 277 | m | 13 | neg | neg | neg |
| 278 | m | 3  | pos | neg | neg |
| 279 | f | 12 | pos | neg | neg |
| 280 | f | 13 | neg | neg | neg |
| 281 | m | 2  | pos | neg | neg |
| 282 | m | 4  | pos | neg | neg |
| 283 | f | 12 | neg | neg | neg |
| 284 | m | 9  | pos | neg | neg |
| 285 | f | 8  | pos | neg | neg |
| 286 | f | 10 | neg | neg | neg |
| 287 | f | 4  | neg | neg | neg |
| 288 | m | 5  | pos | neg | neg |

|     |   |    |     |     |     |
|-----|---|----|-----|-----|-----|
| 289 | m | 7  | neg | neg | neg |
| 290 | f | 1  | pos | neg | neg |
| 291 | m | 6  | neg | neg | neg |
| 292 | m | 1  | neg | neg | neg |
| 293 | m | 3  | neg | neg | neg |
| 294 | f | 7  | pos | neg | neg |
| 295 | f | 5  | pos | neg | neg |
| 296 | f | 11 | neg | neg | neg |
| 297 | m | 12 | neg | neg | neg |
| 298 | f | 11 | pos | neg | neg |
| 299 | f | 10 | neg | neg | neg |
| 300 | m | 12 | pos | neg | neg |
| 301 | f | 5  | neg | neg | neg |
| 302 | f | 8  | neg | neg | neg |
| 303 | m | 14 | pos | neg | neg |
| 304 | f | 3  | pos | neg | neg |
| 305 | f | 12 | neg | neg | neg |
| 306 | f | 1  | neg | neg | neg |
| 307 | m | 11 | pos | neg | neg |
| 308 | f | 5  | neg | neg | neg |
| 309 | f | 8  | neg | neg | neg |
| 310 | f | 7  | neg | neg | neg |
| 311 | m | 7  | neg | neg | neg |
| 312 | f | 5  | neg | neg | neg |
| 313 | m | 6  | neg | neg | neg |
| 314 | m | 12 | neg | neg | neg |
| 315 | m | 9  | neg | neg | neg |
| 316 | m | 12 | pos | neg | neg |
| 317 | f | 2  | neg | neg | neg |
| 318 | f | 4  | neg | neg | neg |
| 319 | f | 13 | neg | neg | neg |
| 320 | m | 13 | neg | neg | neg |
| 321 | f | 5  | neg | neg | neg |
| 322 | m | 3  | neg | neg | neg |
| 323 | m | 10 | neg | neg | neg |
| 324 | m | 10 | neg | neg | neg |
| 325 | f | 10 | neg | neg | neg |
| 326 | m | 6  | neg | neg | neg |
| 327 | f | 12 | neg | neg | neg |
| 328 | f | 13 | neg | neg | neg |
| 329 | f | 11 | neg | neg | neg |
| 330 | m | 1  | neg | neg | neg |
| 331 | m | 15 | neg | neg | neg |
| 332 | m | 16 | neg | neg | neg |
| 333 | m | 13 | pos | neg | neg |
| 334 | f | 10 | neg | neg | neg |
| 335 | f | 10 | neg | neg | neg |
| 336 | m | 5  | neg | neg | neg |
| 337 | f | 12 | neg | neg | neg |

|     |   |    |     |     |     |
|-----|---|----|-----|-----|-----|
| 338 | f | 5  | pos | neg | neg |
| 339 | m | 9  | neg | neg | neg |
| 340 | m | 11 | neg | neg | neg |
| 341 | m | 13 | neg | neg | neg |
| 342 | f | 3  | neg | neg | neg |
| 343 | f | 11 | pos | neg | neg |
| 344 | m | 7  | neg | neg | neg |
| 345 | f | 12 | pos | neg | neg |
| 346 | f | 11 | neg | neg | neg |
| 347 | m | 7  | neg | neg | neg |
| 348 | f | 6  | neg | neg | neg |
| 349 | m | 13 | neg | neg | neg |
| 350 | m | 9  | pos | neg | neg |
| 351 | f | 10 | neg | neg | neg |
| 352 | f | 7  | neg | neg | neg |
| 353 | f | 7  | pos | neg | neg |
| 354 | f | 11 | neg | neg | neg |
| 355 | m | 12 | pos | neg | neg |
| 356 | f | 11 | neg | neg | neg |
| 357 | f | 13 | pos | neg | neg |
| 358 | m | 10 | neg | neg | neg |
| 359 | f | 10 | pos | neg | neg |
| 360 | f | 13 | pos | neg | neg |
| 361 | f | 13 | neg | neg | neg |
| 362 | f | 5  | pos | neg | neg |
| 363 | m | 9  | neg | neg | neg |
| 364 | f | 7  | neg | neg | neg |
| 365 | m | 9  | neg | neg | neg |
| 366 | m | 7  | neg | neg | neg |
| 367 | m | 9  | neg | neg | neg |
| 368 | f | 4  | neg | neg | neg |
| 369 | m | 10 | neg | neg | neg |
| 370 | m | 7  | neg | neg | neg |
| 371 | m | 8  | neg | neg | neg |
| 372 | m | 7  | neg | neg | neg |
| 373 | m | 1  | neg | neg | neg |
| 374 | m | 1  | neg | neg | neg |
| 375 | m | 9  | neg | neg | neg |
| 376 | m | 12 | neg | neg | neg |
| 377 | m | 9  | neg | neg | neg |
| 378 | m | 2  | neg | neg | neg |
| 379 | m | 11 | neg | neg | neg |
| 380 | f | 8  | pos | neg | neg |
| 381 | f | 4  | pos | neg | neg |
| 382 | m | 12 | neg | neg | neg |
| 383 | f | 8  | neg | neg | neg |
| 384 | f | 12 | neg | neg | neg |
| 385 | f | 3  | neg | neg | neg |
| 386 | f | 6  | pos | neg | neg |

|     |   |    |     |     |     |
|-----|---|----|-----|-----|-----|
| 387 | f | 8  | neg | neg | neg |
| 388 | m | 7  | neg | neg | neg |
| 389 | m | 12 | neg | neg | neg |
| 390 | m | 10 | neg | neg | neg |
| 391 | f | 5  | neg | neg | neg |
| 392 | f | 3  | pos | neg | neg |
| 393 | f | 7  | pos | neg | neg |
| 394 | m | 8  | pos | neg | neg |
| 395 | m | 10 | pos | neg | neg |
| 396 | f | 11 | neg | neg | neg |
| 397 | f | 3  | neg | neg | neg |
| 398 | f | 1  | neg | neg | neg |
| 399 | m | 1  | neg | neg | neg |
| 400 | f | 12 | pos | neg | neg |
| 401 | m | 9  | pos | neg | neg |
| 402 | m | 9  | pos | neg | neg |
| 403 | f | 10 | neg | neg | neg |
| 404 | f | 8  | neg | neg | neg |
| 405 | f | 11 | pos | neg | neg |
| 406 | m | 9  | neg | neg | neg |
| 407 | m | 3  | neg | neg | neg |
| 408 | m | 3  | pos | neg | neg |
| 409 | f | 5  | pos | neg | neg |
| 410 | f | 12 | pos | neg | neg |
| 411 | m | 10 | neg | neg | neg |
| 412 | m | 13 | neg | neg | neg |
| 413 | m | 9  | neg | neg | neg |
| 414 | f | 7  | neg | neg | neg |
| 415 | m | 13 | neg | neg | neg |
| 416 | m | 12 | neg | neg | neg |
| 417 | f | 12 | neg | neg | neg |
| 418 | f | 5  | neg | neg | neg |
| 419 | f | 8  | neg | neg | neg |
| 420 | m | 7  | neg | neg | neg |
| 421 | f | 10 | neg | neg | neg |
| 422 | f | 7  | neg | neg | neg |
| 423 | f | 6  | neg | neg | neg |
| 424 | f | 2  | neg | neg | neg |
| 425 | f | 6  | neg | neg | neg |
| 426 | m | 1  | neg | neg | neg |
| 427 | m | 10 | pos | neg | neg |
| 428 | m | 13 | pos | neg | neg |
| 429 | m | 8  | neg | neg | neg |
| 430 | m | 3  | neg | neg | neg |
| 431 | m | 8  | pos | neg | neg |
| 432 | f | 12 | neg | neg | neg |
| 433 | m | 8  | pos | neg | neg |
| 434 | f | 6  | neg | neg | neg |
| 435 | m | 1  | neg | neg | neg |

|     |   |    |     |     |     |
|-----|---|----|-----|-----|-----|
| 436 | m | 11 | neg | neg | neg |
| 437 | f | 13 | neg | neg | neg |
| 438 | m | 12 | neg | neg | neg |
| 439 | f | 8  | pos | neg | neg |
| 440 | m | 11 | neg | neg | neg |
| 441 | m | 7  | neg | neg | neg |
| 442 | m | 4  | neg | neg | neg |
| 443 | m | 7  | neg | neg | neg |
| 444 | f | 12 | neg | neg | neg |
| 445 | f | 11 | neg | neg | neg |
| 446 | f | 3  | neg | neg | neg |
| 447 | f | 9  | neg | neg | neg |
| 448 | m | 6  | neg | neg | neg |
| 449 | m | 8  | neg | neg | neg |
| 450 | f | 15 | neg | neg | neg |
| 451 | f | 10 | neg | neg | neg |
| 452 | m | 3  | neg | neg | neg |
| 453 | f | 2  | neg | neg | neg |
| 454 | f | 13 | neg | neg | neg |
| 455 | f | 13 | neg | neg | neg |
| 456 | f | 5  | neg | neg | neg |
| 457 | m | 9  | neg | neg | neg |
| 458 | m | 11 | neg | neg | neg |
| 459 | m | 12 | neg | neg | neg |
| 460 | f | 3  | neg | neg | neg |
| 461 | f | 12 | neg | neg | neg |
| 462 | m | 8  | neg | neg | neg |
| 463 | f | 12 | neg | neg | neg |
| 464 | m | 3  | neg | neg | neg |
| 465 | f | 5  | neg | neg | neg |
| 466 | m | 3  | neg | neg | neg |
| 467 | f | 13 | pos | neg | neg |
| 468 | m | 14 | neg | neg | neg |
| 469 | f | 6  | neg | neg | neg |
| 470 | f | 6  | neg | neg | neg |
| 471 | m | 9  | neg | neg | neg |
| 472 | m | 7  | neg | neg | neg |
| 473 | m | 12 | neg | neg | neg |
| 474 | m | 7  | neg | neg | neg |
| 475 | m | 4  | pos | neg | neg |
| 476 | m | 1  | pos | neg | neg |
| 477 | m | 1  | neg | neg | neg |
| 478 | f | 13 | neg | neg | neg |
| 479 | m | 7  | neg | neg | neg |
| 480 | m | 3  | neg | neg | neg |
| 481 | m | 1  | neg | neg | neg |
| 482 | f | 11 | neg | neg | neg |
| 483 | m | 10 | pos | neg | neg |
| 484 | m | 8  | neg | neg | neg |



|     |   |    |     |     |     |
|-----|---|----|-----|-----|-----|
| 485 | m | 2  | neg | neg | neg |
| 486 | f | 9  | neg | neg | neg |
| 487 | f | 3  | neg | neg | neg |
| 488 | m | 13 | neg | neg | neg |
| 489 | m | 1  | pos | neg | neg |
| 490 | f | 2  | neg | neg | neg |
| 491 | m | 6  | pos | neg | neg |
| 492 | m | 7  | neg | neg | neg |
| 493 | f | 9  | neg | neg | neg |
| 494 | f | 11 | neg | neg | neg |
| 495 | m | 13 | neg | neg | neg |
| 496 | f | 10 | neg | neg | neg |
| 497 | m | 13 | neg | neg | neg |
| 498 | m | 11 | neg | neg | neg |
| 499 | f | 2  | pos | neg | neg |
| 500 | f | 13 | neg | neg | neg |
| 501 | m | 14 | neg | neg | neg |
| 502 | m | 7  | neg | neg | neg |
| 503 | f | 12 | neg | neg | neg |
| 504 | f | 1  | neg | neg | neg |
| 505 | m | 8  | neg | neg | neg |
| 506 | f | 9  | pos | neg | neg |
| 507 | f | 3  | neg | neg | neg |
| 508 | f | 5  | neg | neg | neg |
| 509 | m | 1  | neg | neg | neg |
| 510 | f | 10 | neg | neg | neg |
| 511 | m | 13 | neg | neg | neg |
| 512 | f | 11 | neg | neg | neg |
| 513 | f | 1  | pos | neg | neg |
| 514 | m | 11 | pos | neg | neg |
| 515 | f | 9  | pos | neg | neg |
| 516 | m | 2  | neg | neg | neg |
| 517 | m | 6  | neg | neg | neg |
| 518 | m | 3  | neg | neg | neg |
| 519 | m | 13 | pos | neg | neg |
| 520 | f | 5  | pos | neg | neg |
| 521 | f | 4  | pos | neg | neg |
| 522 | f | 10 | pos | neg | neg |
| 523 | m | 10 | pos | neg | neg |
| 524 | f | 6  | neg | neg | neg |
| 525 | f | 11 | neg | neg | neg |
| 526 | f | 8  | neg | neg | neg |
| 527 | f | 11 | neg | neg | neg |
| 528 | m | 13 | neg | neg | neg |
| 529 | f | 6  | pos | neg | neg |
| 530 | m | 13 | pos | neg | neg |
| 531 | f | 10 | pos | neg | neg |
| 532 | m | 8  | neg | neg | neg |
| 533 | f | 13 | neg | neg | neg |

|     |   |    |     |     |     |
|-----|---|----|-----|-----|-----|
| 534 | f | 9  | neg | neg | neg |
| 535 | f | 7  | neg | neg | neg |
| 536 | m | 8  | neg | neg | neg |
| 537 | f | 5  | pos | neg | neg |
| 538 | m | 3  | neg | neg | neg |
| 539 | f | 5  | neg | neg | neg |
| 540 | f | 8  | neg | neg | neg |
| 541 | m | 5  | pos | neg | neg |
| 542 | m | 2  | neg | neg | neg |
| 543 | m | 3  | neg | neg | neg |
| 544 | m | 1  | neg | neg | neg |
| 545 | m | 8  | neg | neg | neg |
| 546 | m | 11 | neg | neg | neg |
| 547 | m | 14 | neg | neg | neg |
| 548 | m | 4  | neg | neg | neg |
| 549 | f | 10 | neg | neg | neg |
| 550 | m | 6  | neg | neg | neg |
| 551 | m | 10 | neg | neg | neg |
| 552 | f | 12 | neg | neg | neg |
| 553 | m | 7  | neg | neg | neg |
| 554 | m | 1  | neg | neg | neg |
| 555 | m | 5  | neg | neg | neg |
| 556 | f | 7  | neg | neg | neg |
| 557 | f | 2  | pos | neg | neg |
| 558 | f | 13 | neg | neg | neg |
| 559 | f | 8  | neg | neg | neg |
| 560 | m | 6  | pos | neg | neg |
| 561 | f | 13 | neg | neg | neg |
| 562 | f | 13 | neg | neg | neg |
| 563 | f | 8  | neg | neg | neg |
| 564 | f | 6  | neg | neg | neg |
| 565 | m | 6  | neg | neg | neg |
| 566 | f | 9  | neg | neg | neg |
| 567 | m | 5  | neg | neg | neg |
| 568 | f | 4  | neg | neg | neg |
| 569 | m | 11 | neg | neg | neg |
| 570 | m | 12 | neg | neg | neg |
| 571 | f | 12 | neg | neg | neg |
| 572 | f | 8  | neg | neg | neg |
| 573 | f | 13 | neg | neg | neg |
| 574 | m | 4  | neg | neg | neg |
| 575 | m | 3  | neg | neg | neg |
| 576 | f | 3  | pos | neg | neg |
| 577 | m | 2  | neg | neg | neg |
| 578 | m | 3  | neg | neg | neg |
| 579 | m | 13 | pos | neg | neg |
| 580 | f | 3  | neg | neg | neg |
| 581 | f | 13 | neg | neg | neg |
| 582 | f | 4  | neg | neg | neg |

|     |   |    |     |     |     |
|-----|---|----|-----|-----|-----|
| 583 | m | 6  | pos | neg | neg |
| 584 | m | 16 | pos | neg | neg |
| 585 | f | 3  | pos | neg | neg |
| 586 | f | 13 | neg | neg | neg |
| 587 | m | 13 | neg | neg | neg |
| 588 | m | 1  | neg | neg | neg |
| 589 | m | 4  | neg | neg | neg |
| 590 | f | 3  | neg | neg | neg |
| 591 | m | 1  | pos | neg | neg |
| 592 | m | 8  | neg | neg | neg |
| 593 | m | 9  | neg | neg | neg |
| 594 | m | 1  | pos | neg | neg |
| 595 | m | 8  | neg | neg | neg |
| 596 | f | 6  | neg | neg | neg |
| 597 | f | 7  | neg | neg | neg |
| 598 | m | 12 | neg | neg | neg |
| 599 | f | 5  | neg | neg | neg |
| 600 | f | 11 | pos | neg | neg |
| 601 | f | 3  | neg | neg | neg |
| 602 | m | 4  | neg | neg | neg |
| 603 | f | 3  | neg | neg | neg |
| 604 | m | 2  | neg | neg | neg |
| 605 | f | 8  | neg | neg | neg |
| 606 | f | 5  | neg | neg | neg |
| 607 | m | 1  | neg | neg | neg |
| 608 | f | 0  | neg | neg | neg |

Supplementary Figures

Supplementary Figure 1)

A)

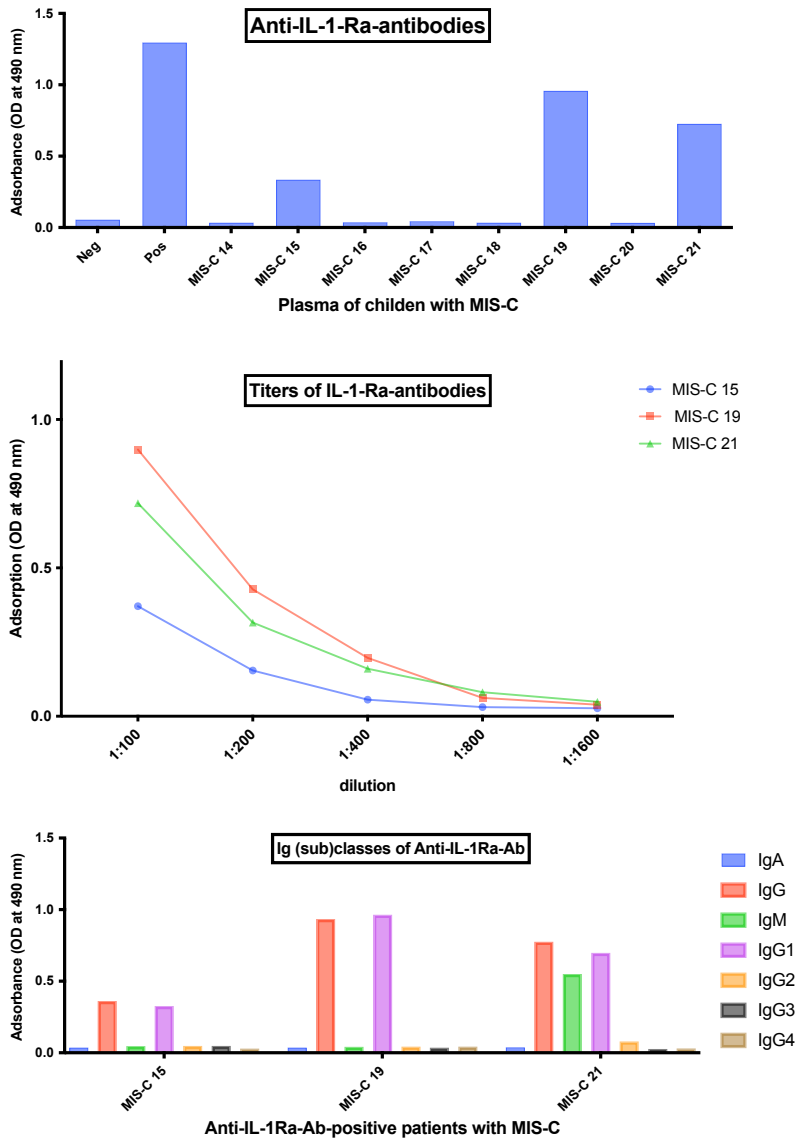

B)

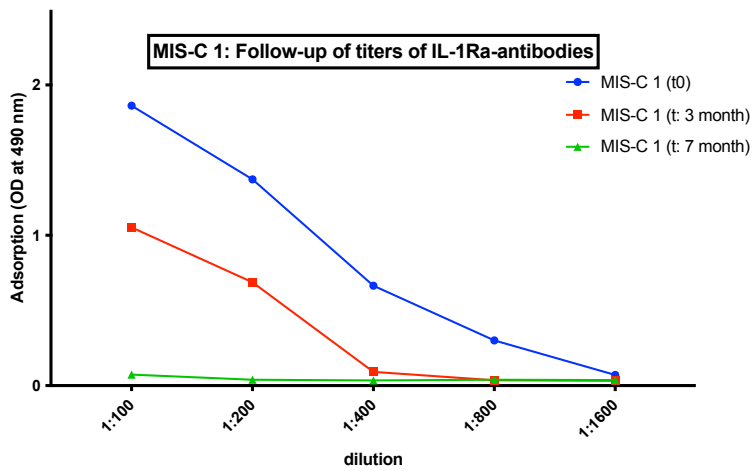

C)

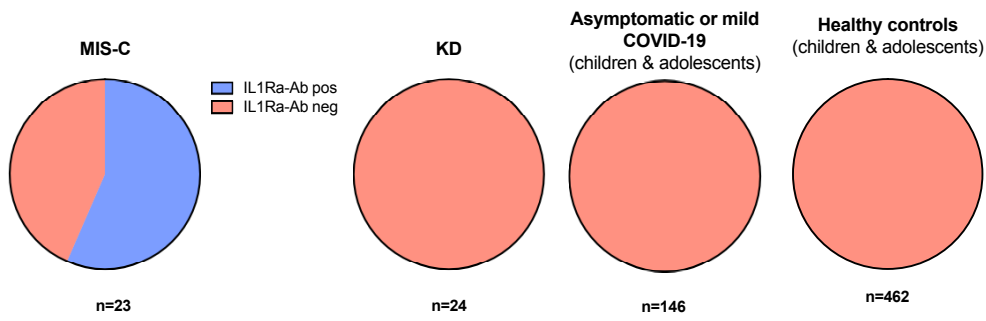

**Supplementary Figure 1:** A) ELISA of IL-1Ra-Abs of MIS-C-14 to MIS-C-21, and the titers, Ig classes and IgG subclasses of IL-1Ra-Ab-seropositive patients. B) Course of titers of IL-1Ra antibodies of case MIS-C 1 at initial presentation and 3-month and 7-month follow-up. C) Frequency of IL-1Ra-Abs in MIS-C and control groups.

Supplementary Figure 2)

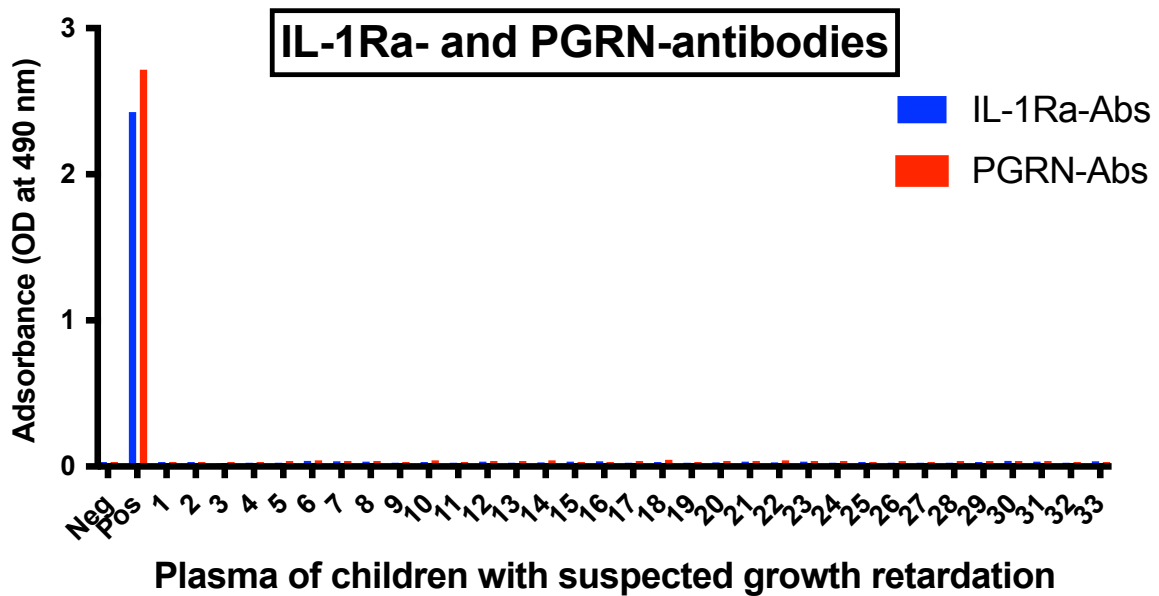

**Supplementary Figure 2:** ELISA of IL-1Ra-Abs and PGRN-Abs in 33 children with suspected growth retardation as a non-inflammatory control group.

Supplementary Figure 3)

A)

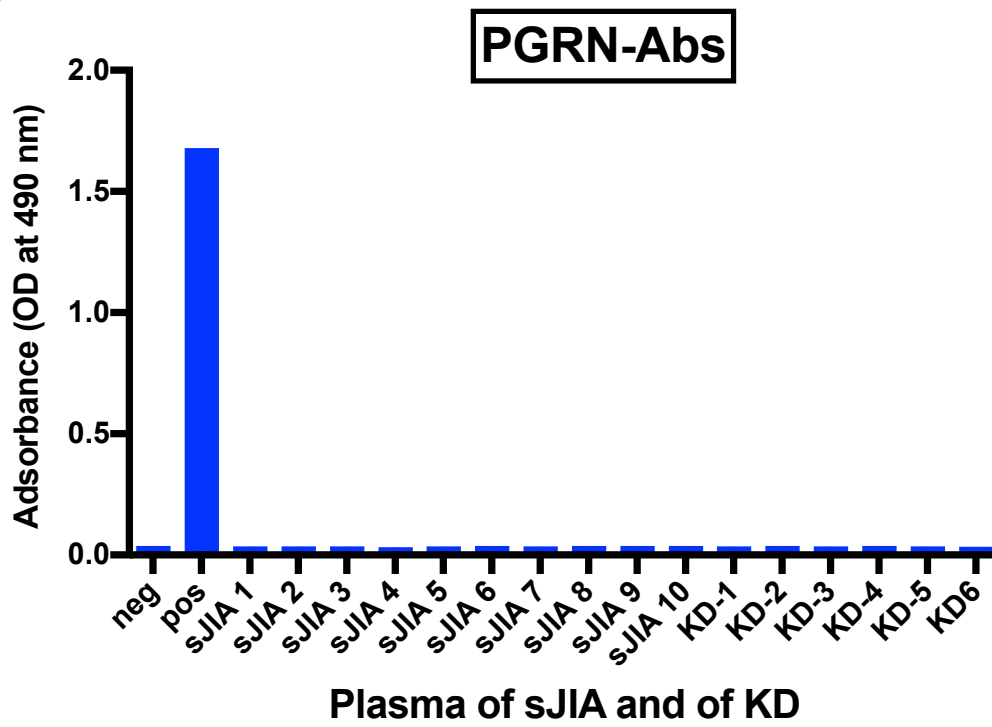

B)

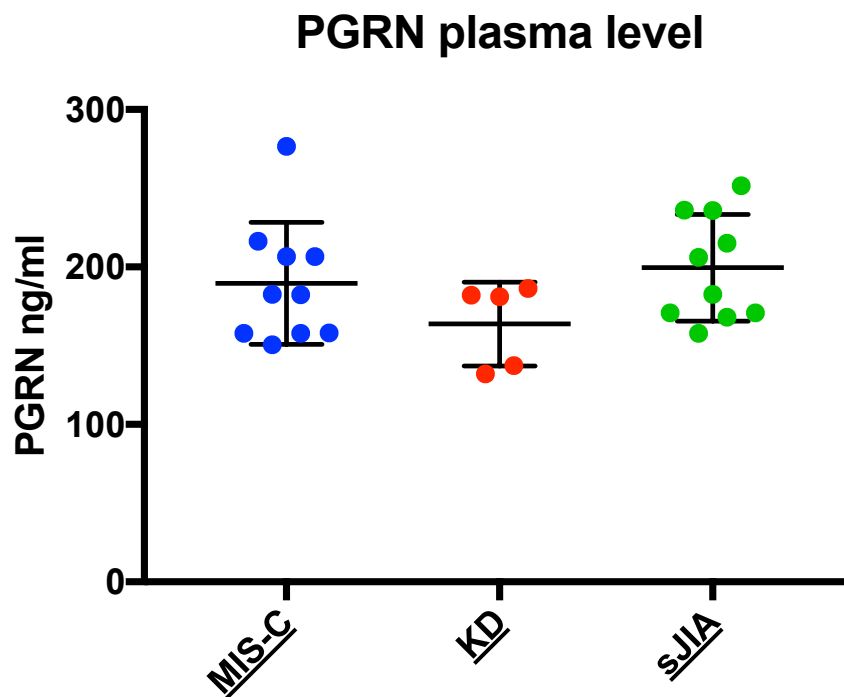

C)

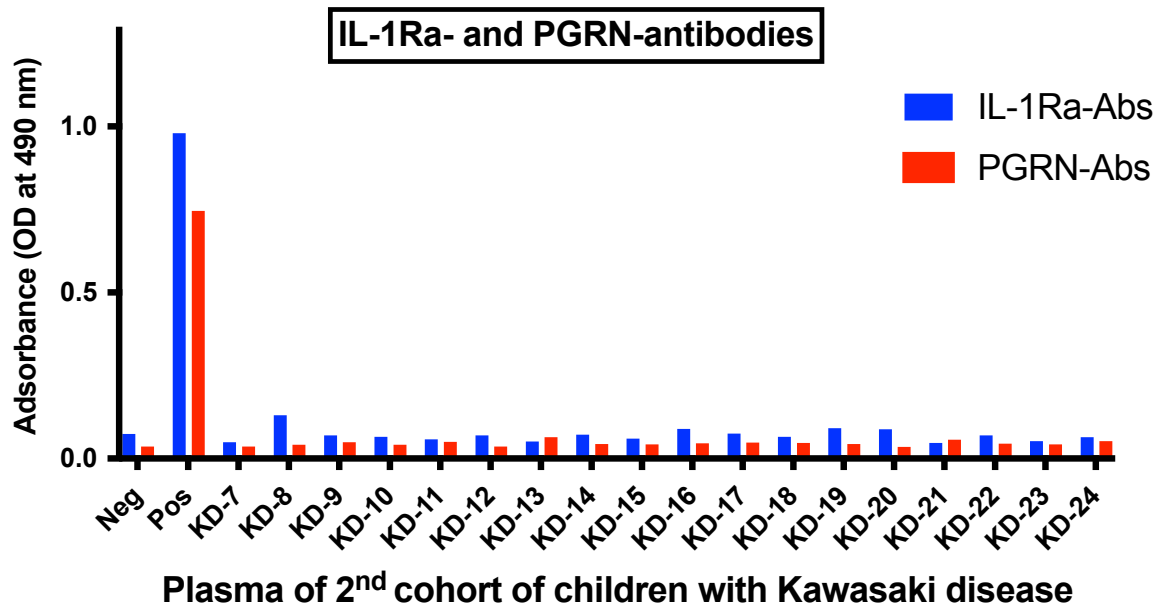

**Supplementary Figure 3:** A) ELISA of PGRN-Abs in children with sJIA in remission (5 of them under treatment with anakinra), and in IVIG-naive samples of active Kawasaki disease (1<sup>st</sup> cohort). B) PGRN plasma levels in MIS-C, 1<sup>st</sup> cohort of patients with KD, and sJIA. C) ELISA of IL-1-Ra-Abs and PGRN-Abs in 18 patients (KD7 to KD24) comprising the 2<sup>nd</sup> cohort of patients with KD.

Supplementary Figure 4)

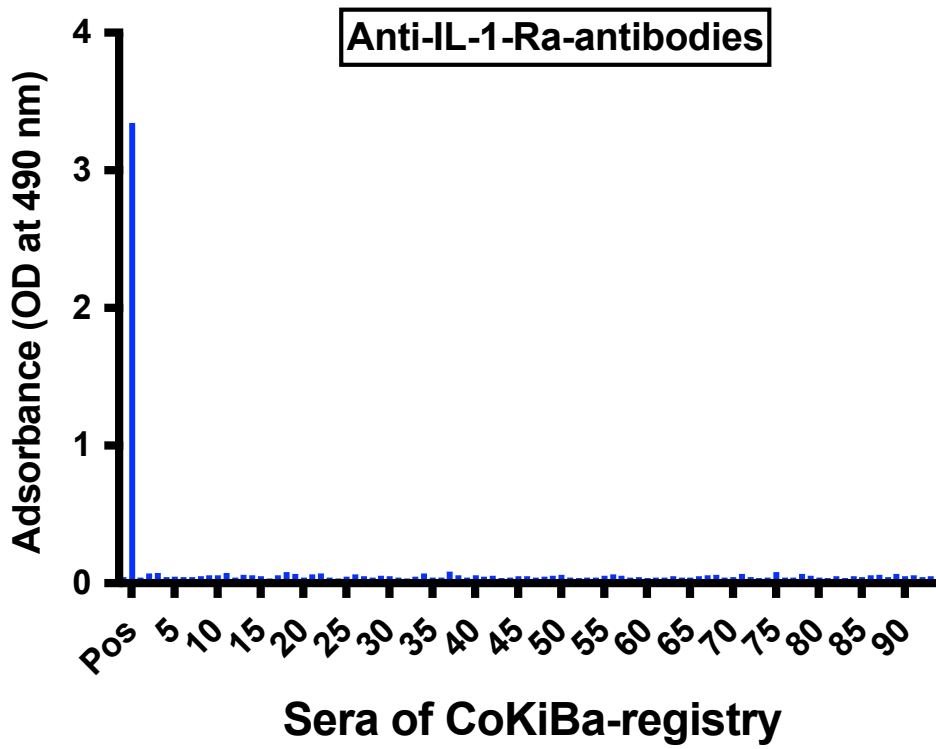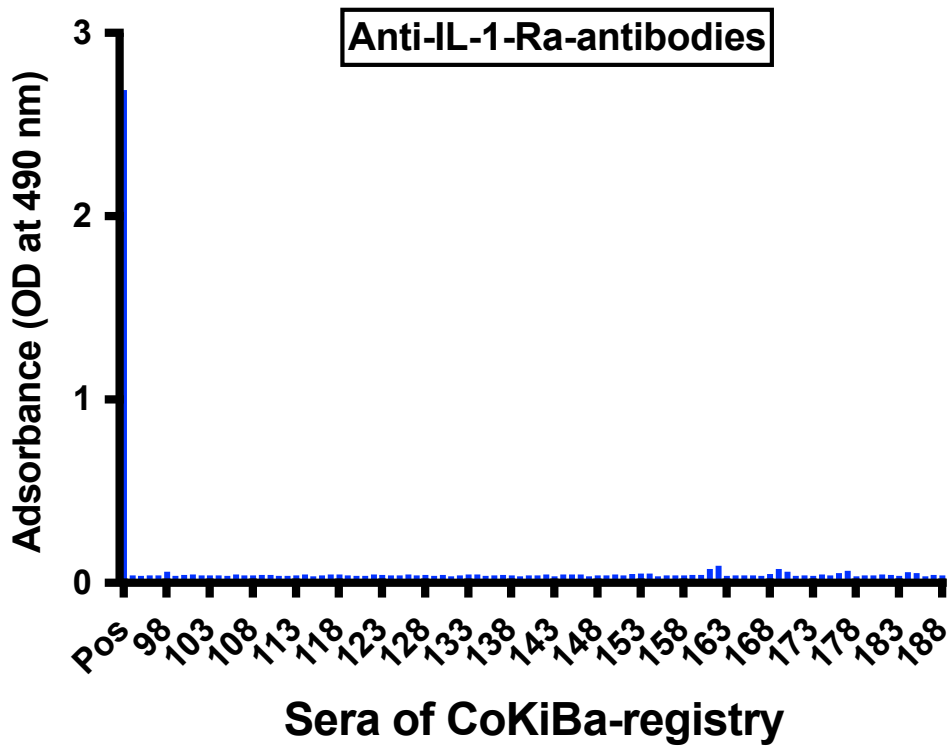



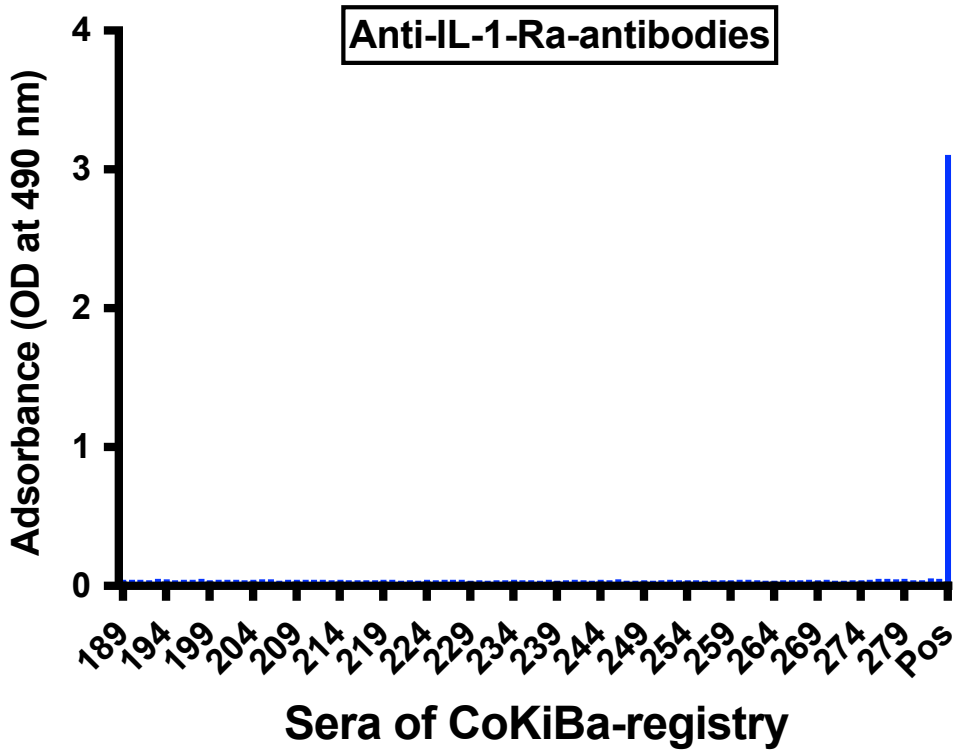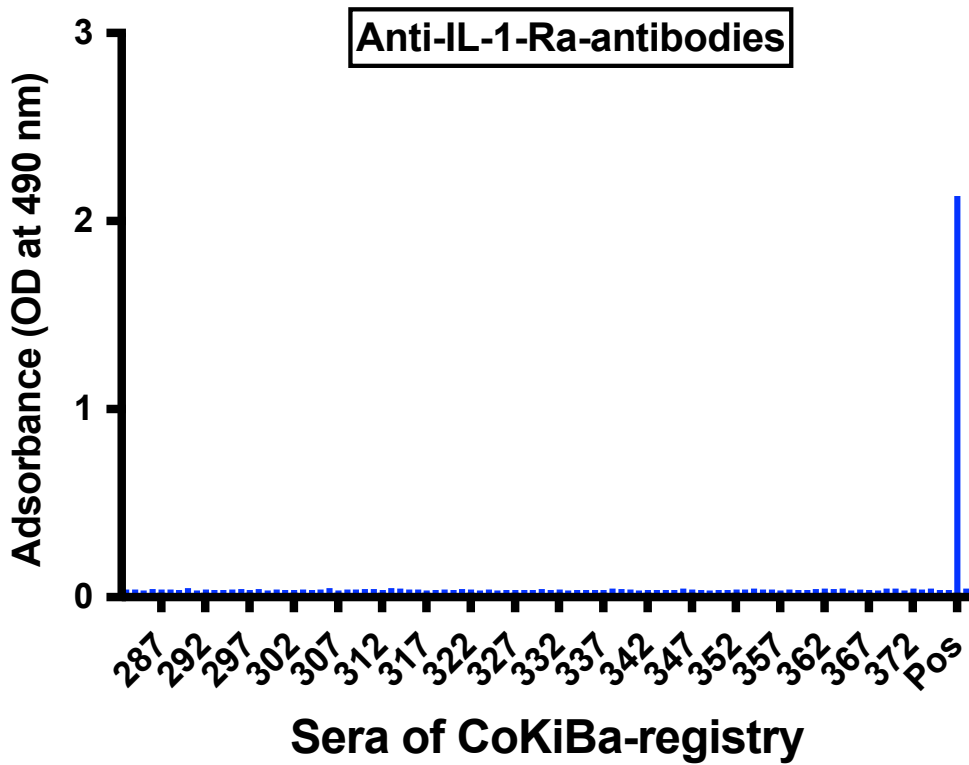

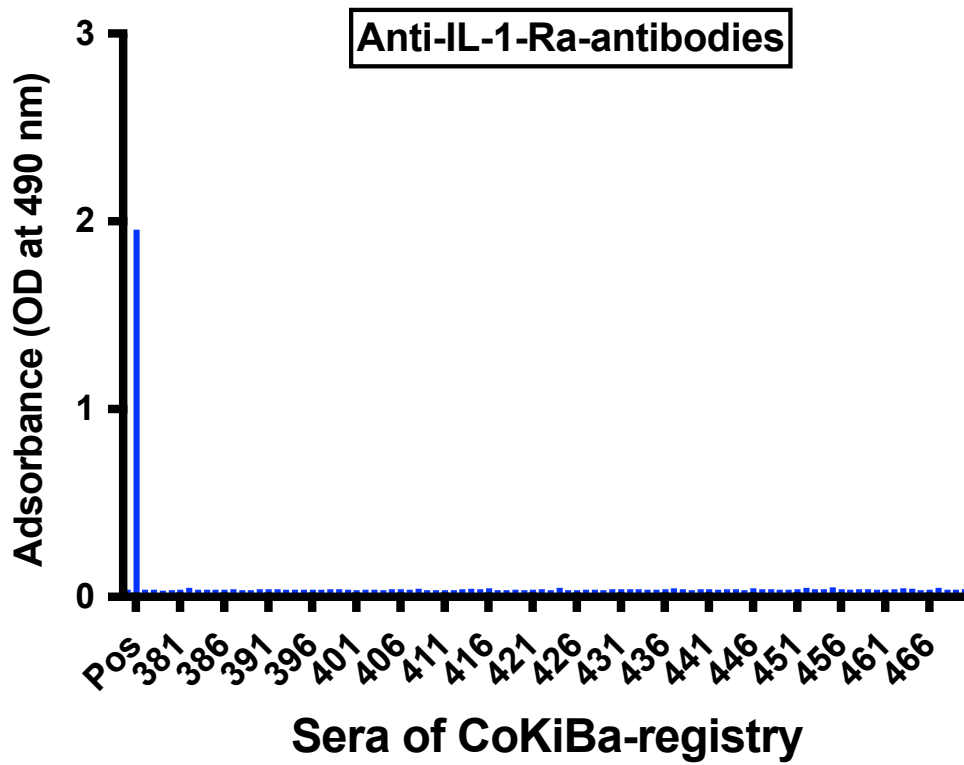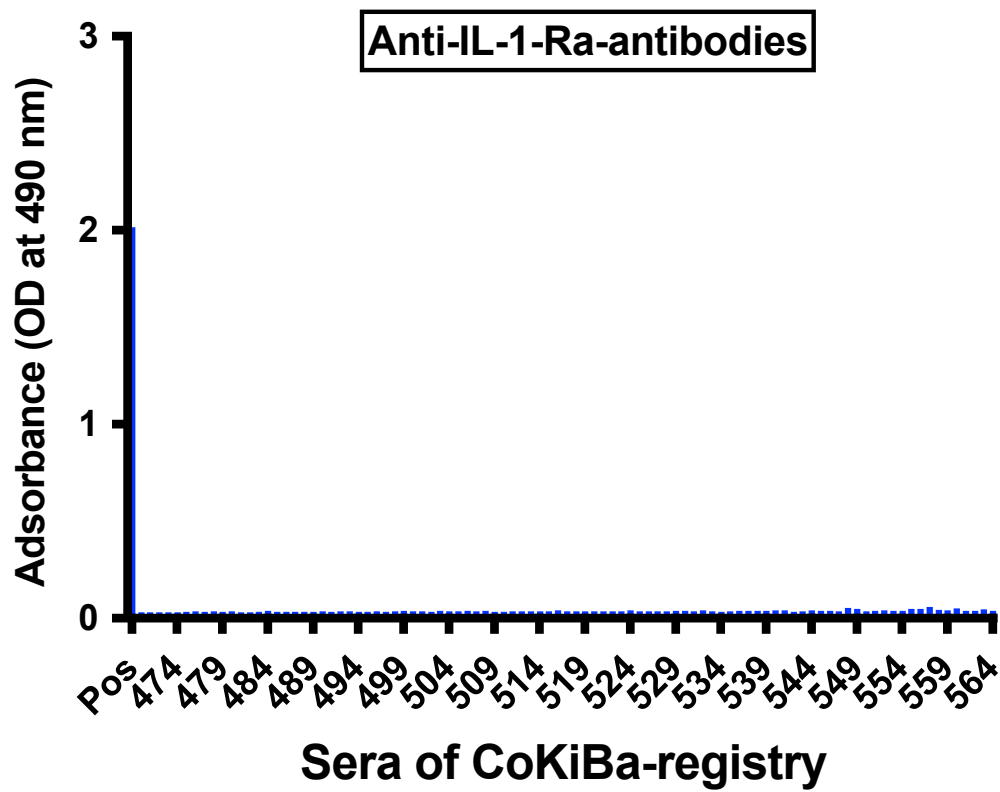

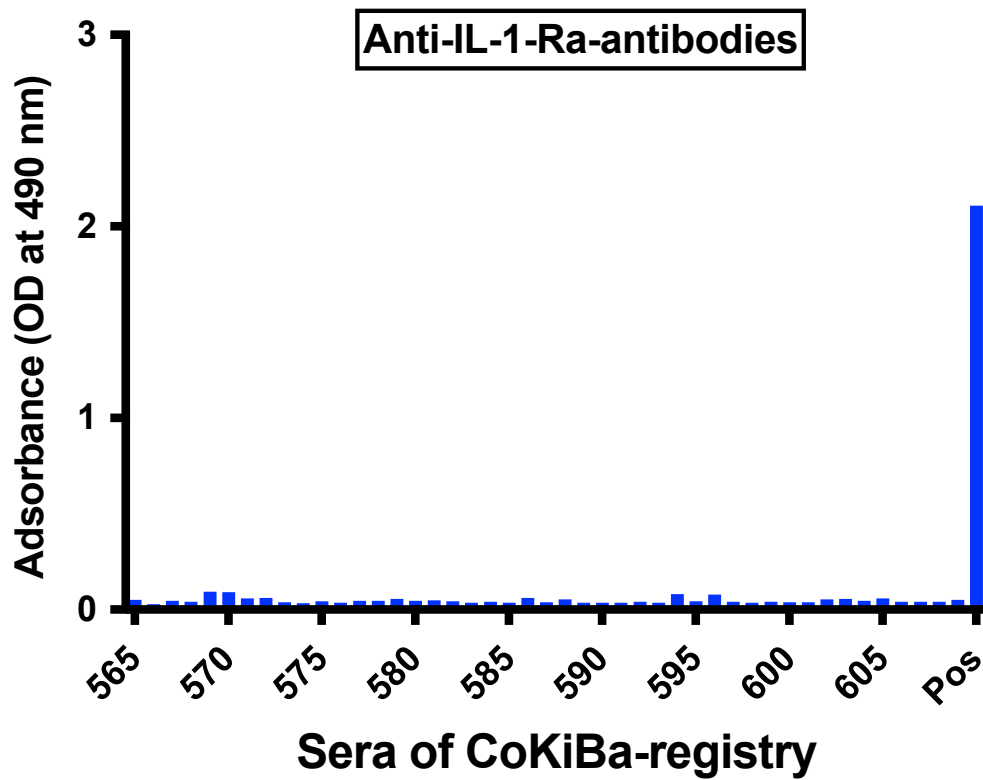

**Supplementary Figure 4:** ELISA of IL-1-Ra-Abs in samples of 608 children of the CoKiBa registry. Samples were obtained 3 months after the first wave of COVID-19 in Bavaria. 146 children had a positive SARS-CoV-2 serology, 462 had a SARS-CoV-2-negative serology and were healthy controls (see supplementary table 1). ELISA were performed blinded. IL-1-Ra-Abs were not detected in any of the 608 children.

Supplementary Figure 5)

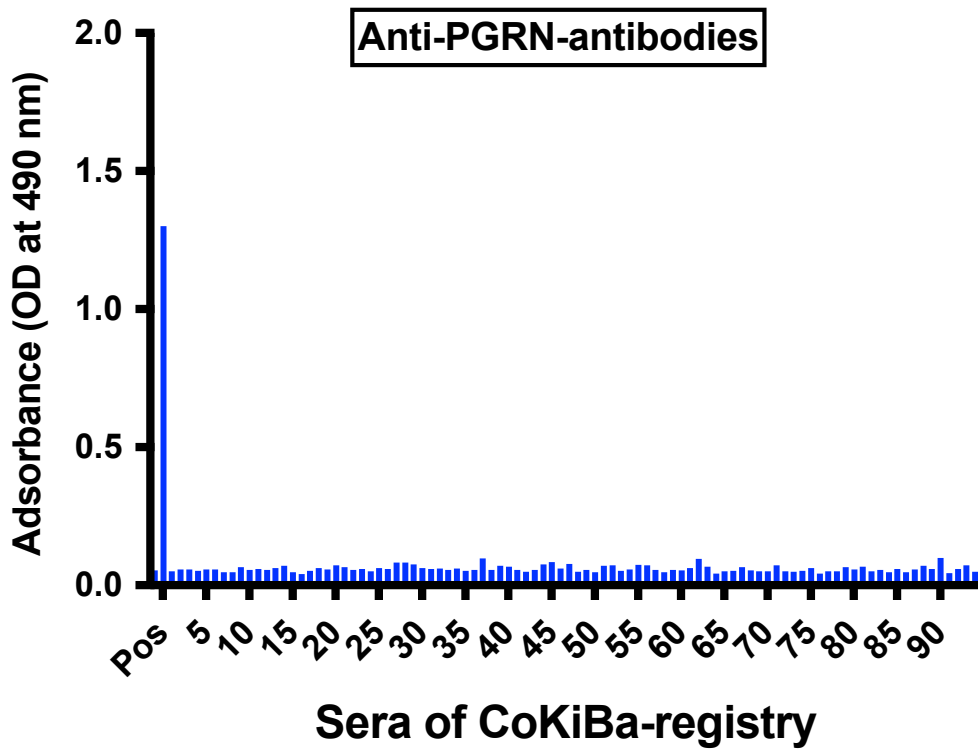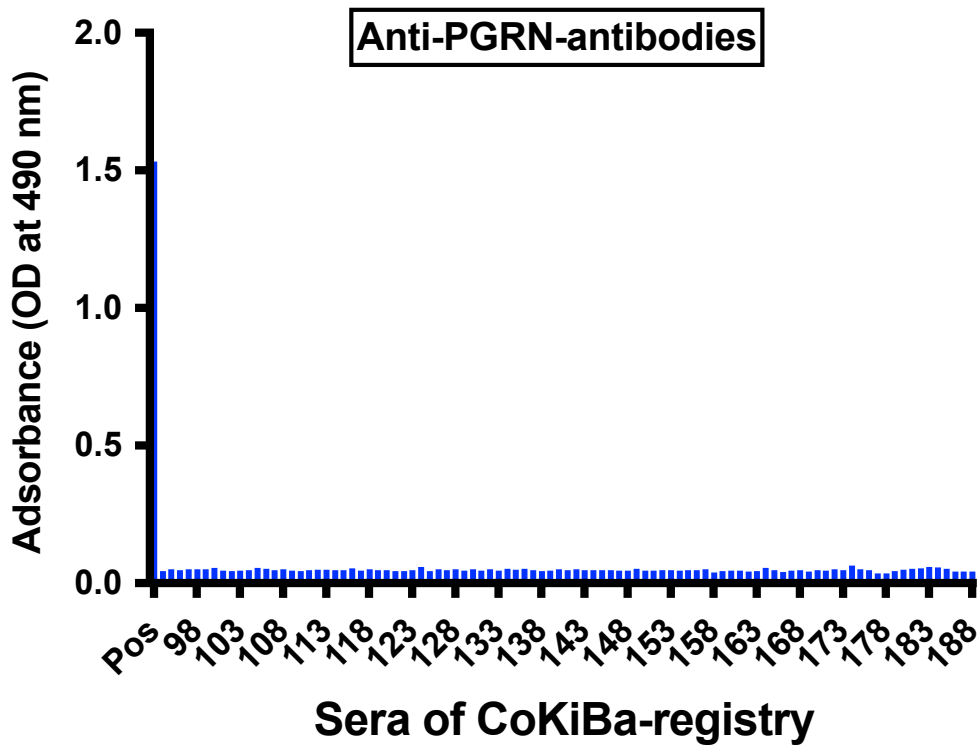

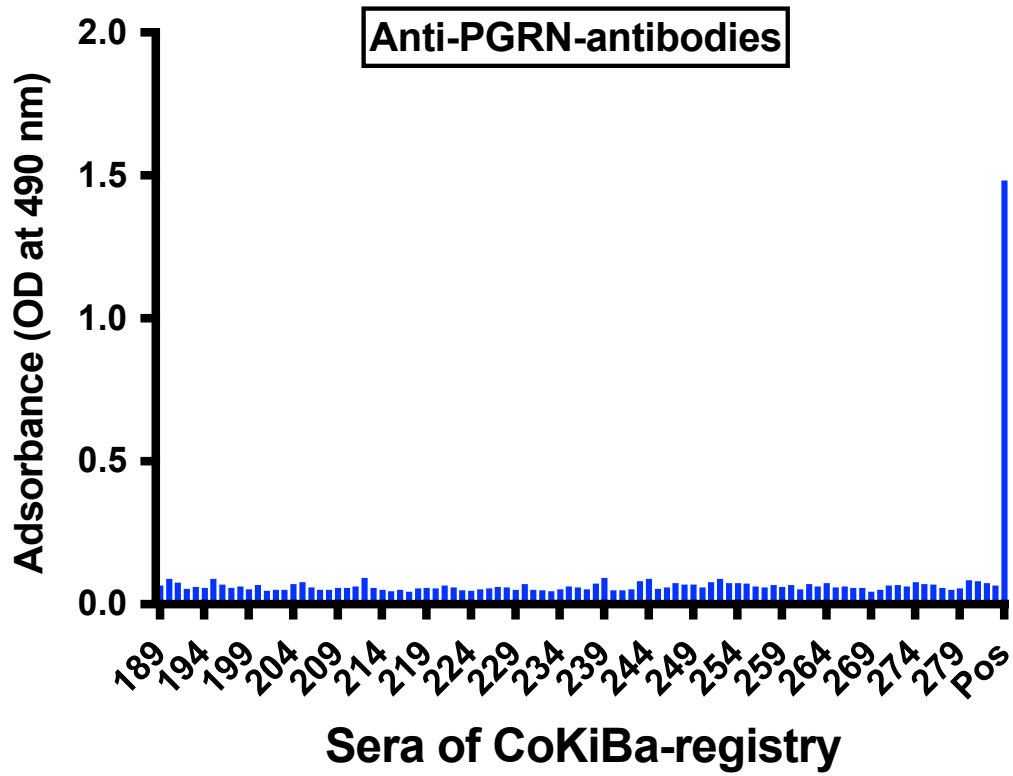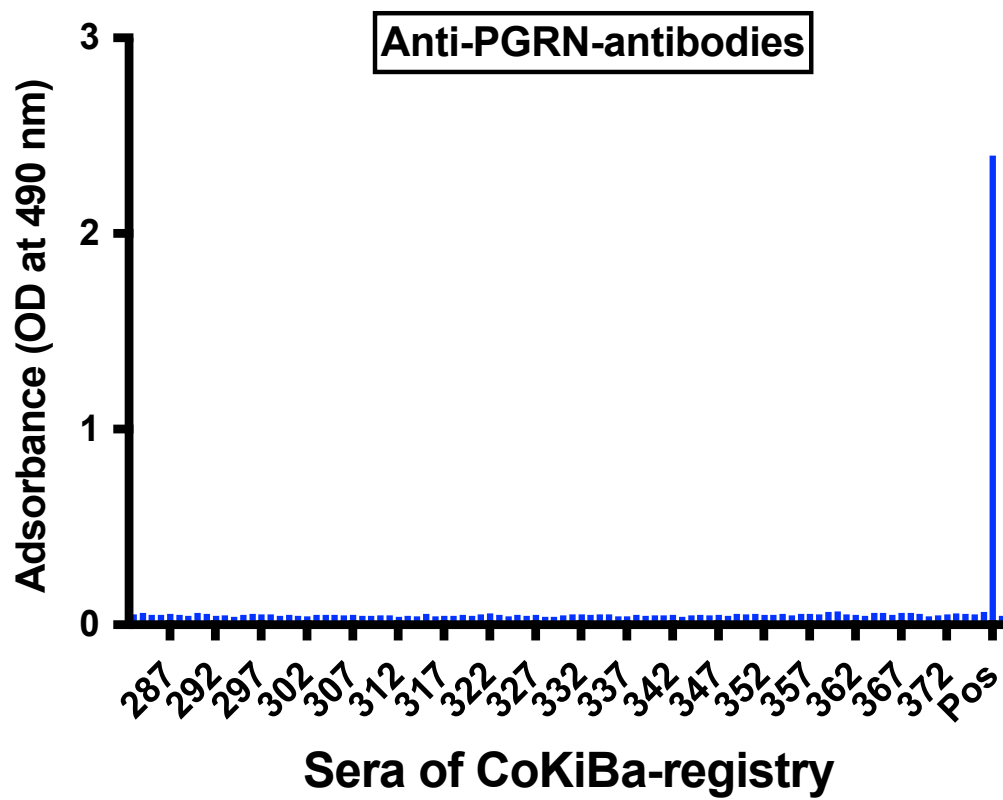

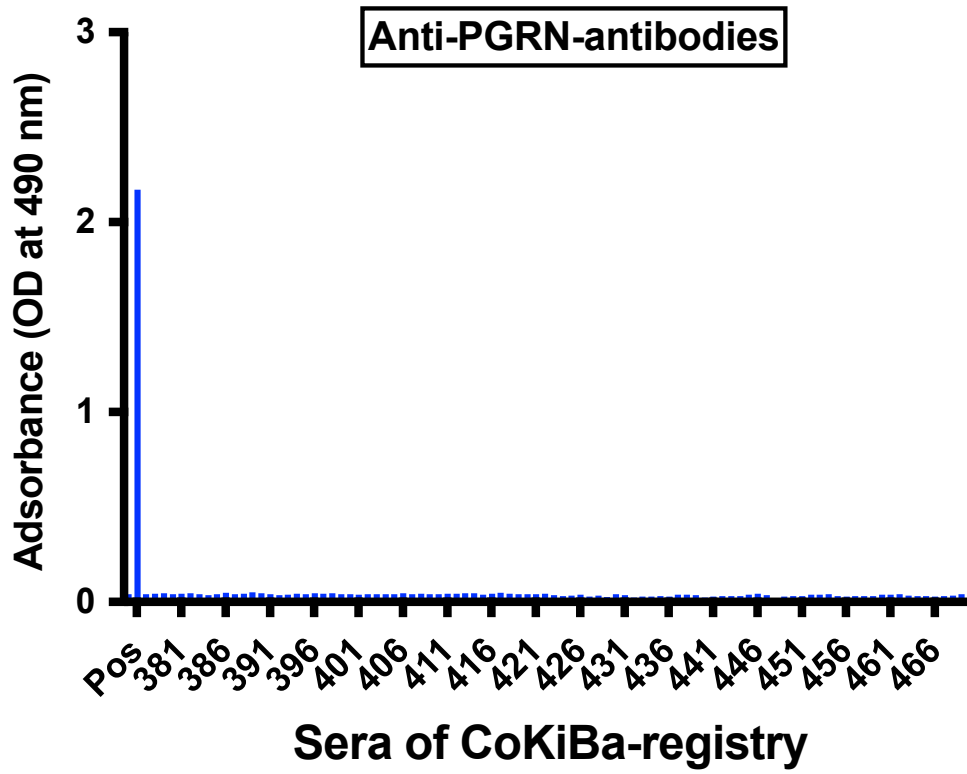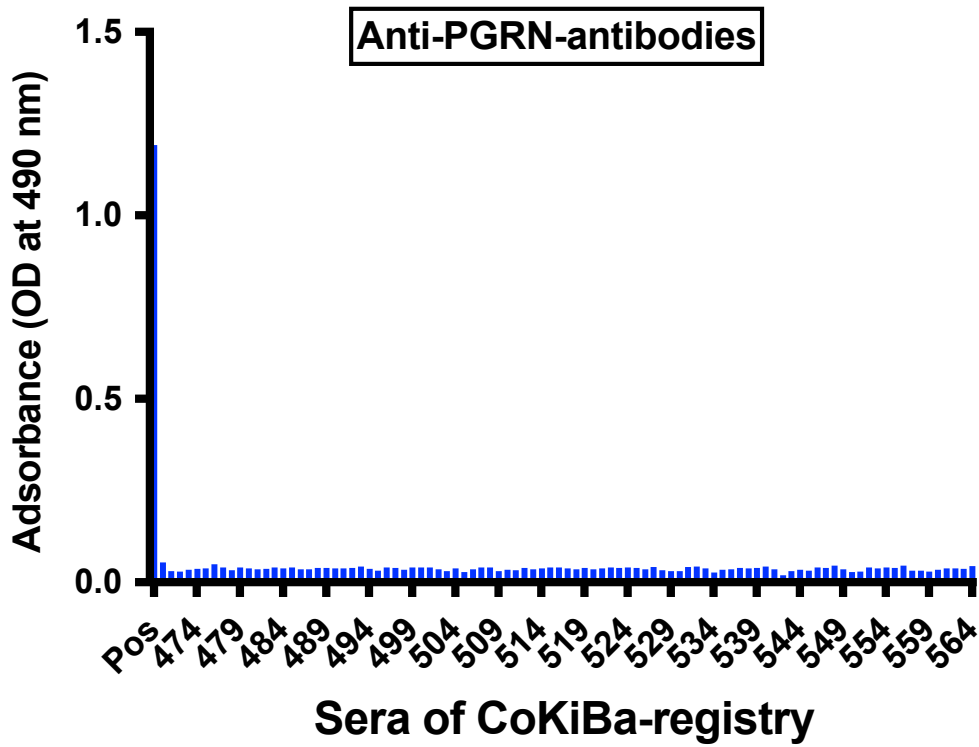

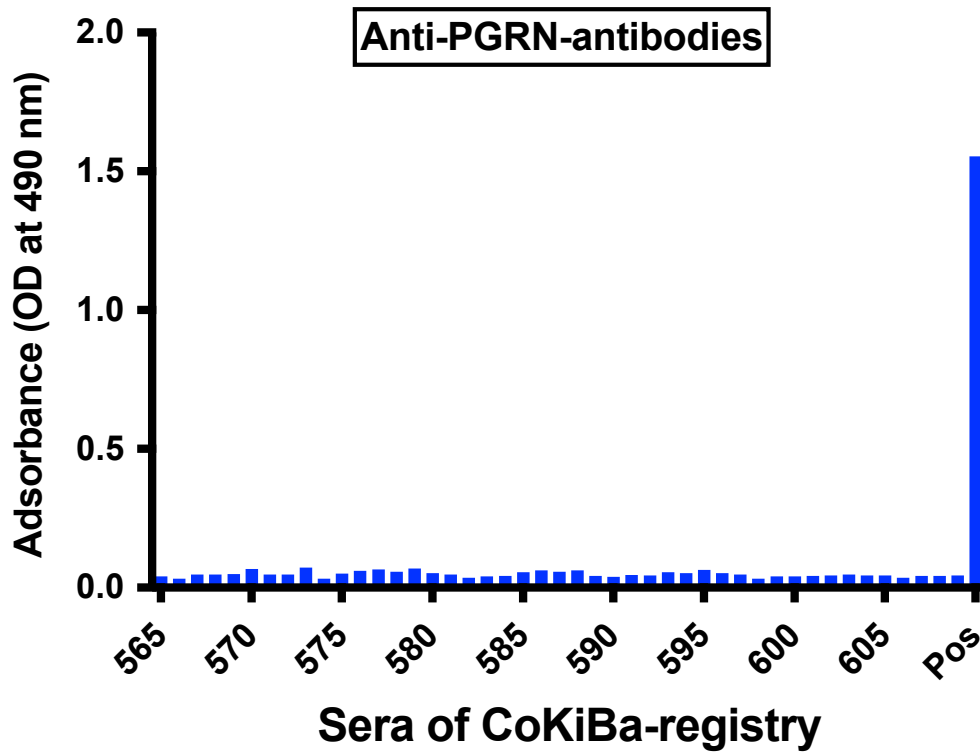

**Supplementary Figure 5:** ELISA of PGRN-Abs in samples of 608 children of the CoKiBa registry. Samples were obtained 1-3 months after the first wave of COVID-19 in Bavaria. 146 children had a positive SARS-CoV-2 serology, 462 had a SARS-CoV-2-negative serology and were healthy controls (see supplementary table 1). ELISA were performed blinded. PGRN-Abs were not detected in any of the 608 children.

Supplementary Figure 6)

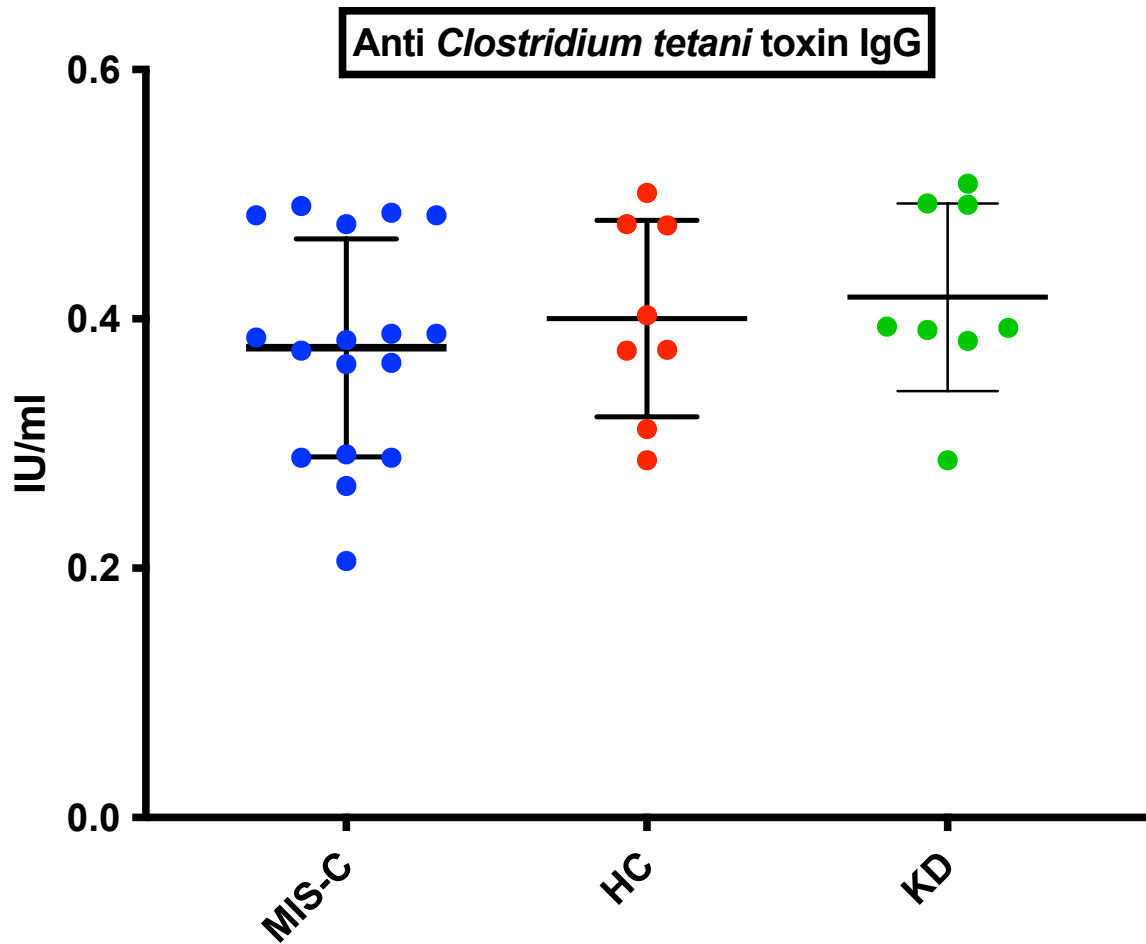

**Supplementary Figure 6:** Anti *tetanus toxin* IgG antibodies in MIS-C, healthy controls and patients with Kawasaki disease. All individuals had antibody titers compatible with reliable protection.



Supplementary Figure 7)

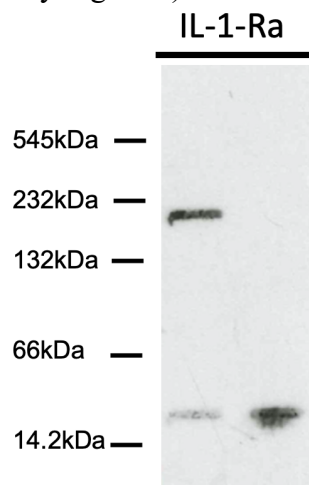

| Patient PIMS-I | t=0 | t=7m |
|----------------|-----|------|
| IL-1-Ra-Ab     | pos | neg  |

**Supplementary Figure 7:** WB of IL-1-Ra of total plasma protein in a native, gradient gel under non-reducing conditions of patient MIS-C-I at presentation with acute inflammation and seropositive for IL-1-Ra-Abs of IgG class and 7 months later without IL-1-Ra-Abs.

Supplementary Figure 8: **Isoelectric focusing and Western blot of IL-1Ra**

A)

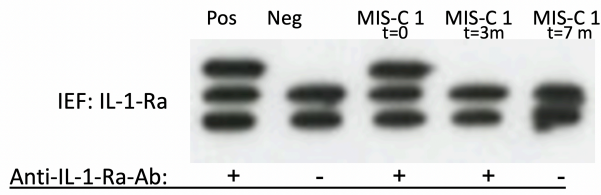

(A) Isoelectric focusing (IEF) of IL-1Ra from samples in course of acute inflammation of one selected MIS-C patient (MIS-C 1) and in the follow-up. Anti-IL-1Ra antibody status of respective samples is indicated by +/-.

B)

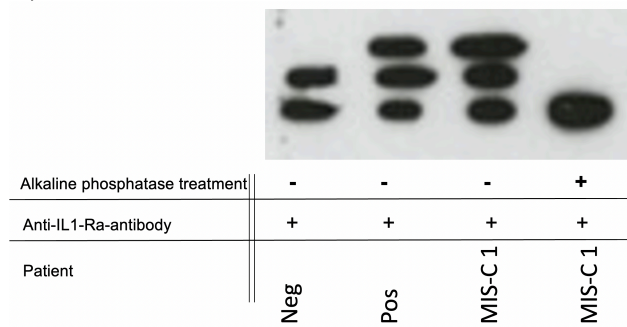

(B) Alkaline phosphatase treatment of IL-1-Ra from the plasma of a single MIS-C patient with available follow-up samples.

C)

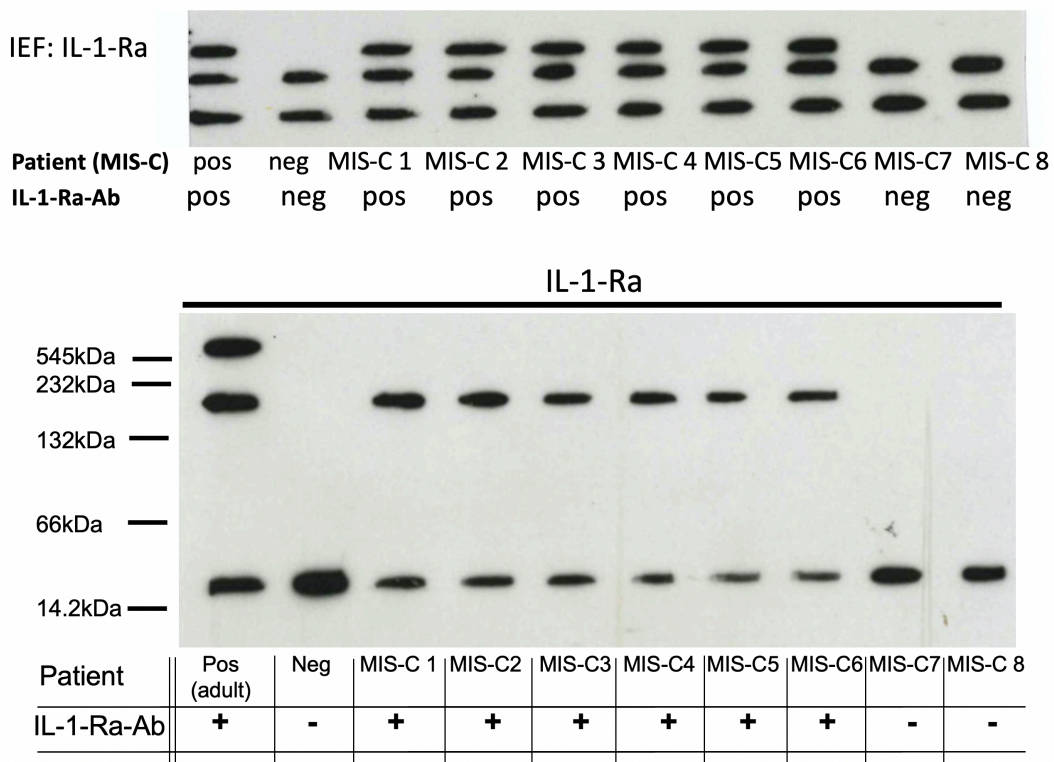

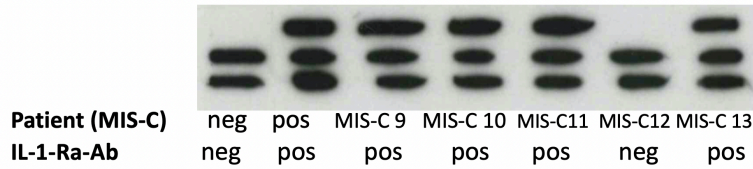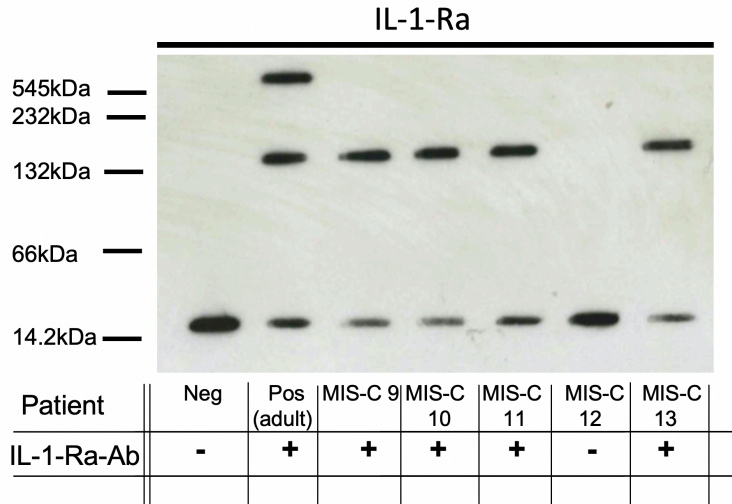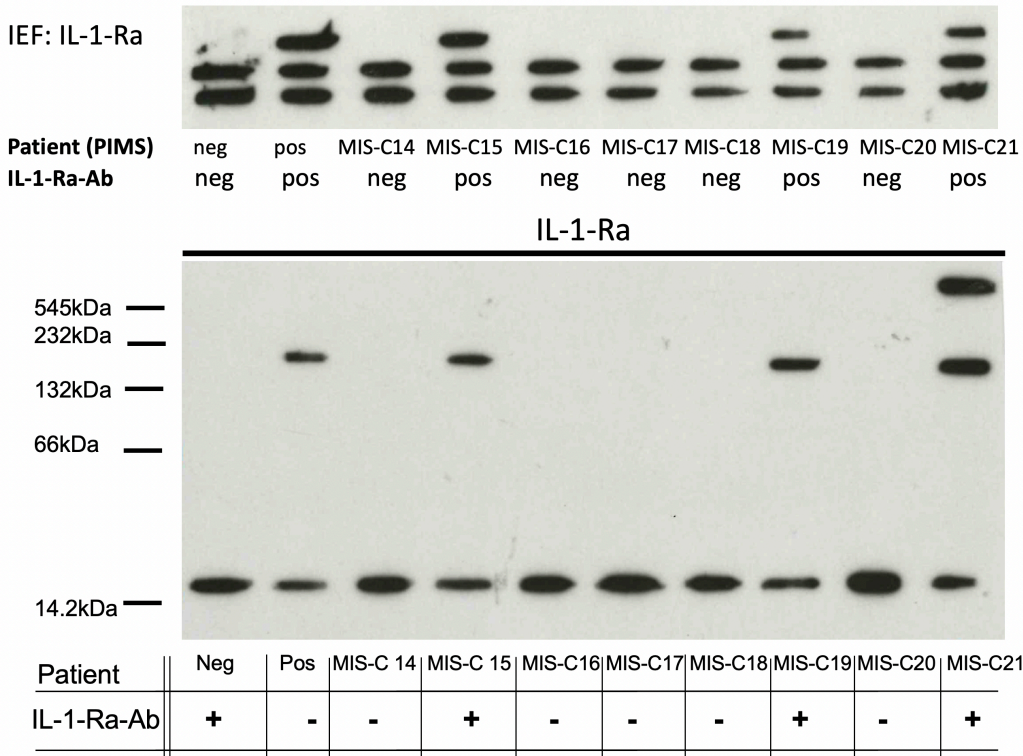

C) IEF and native gradient SDS PAGE and Western-blots of IL-1Ra in 21 consecutive patients with MIS-C (n=21) of IL-1-Ra in patients with MIS-C (C, n=21). Positive control was in the first two gradient SDS PAGEs was plasma of an adult with critical COVID-19 and IL-1-Ra-Abs of IgG and IgM class, and in the third SDS PAGE a patient with IL-1-Ra-Abs of IgG class, negative control of a healthy individual without IL-1-Ra-Abs.



E)

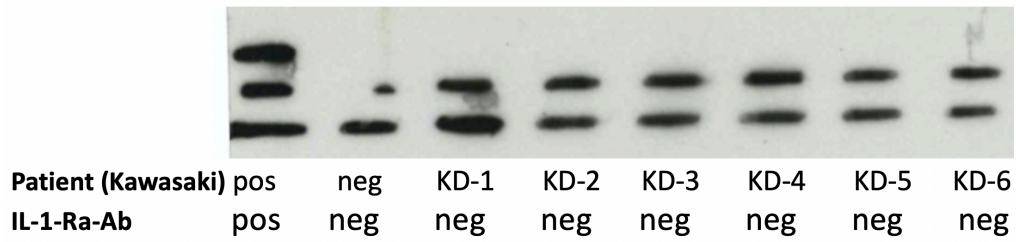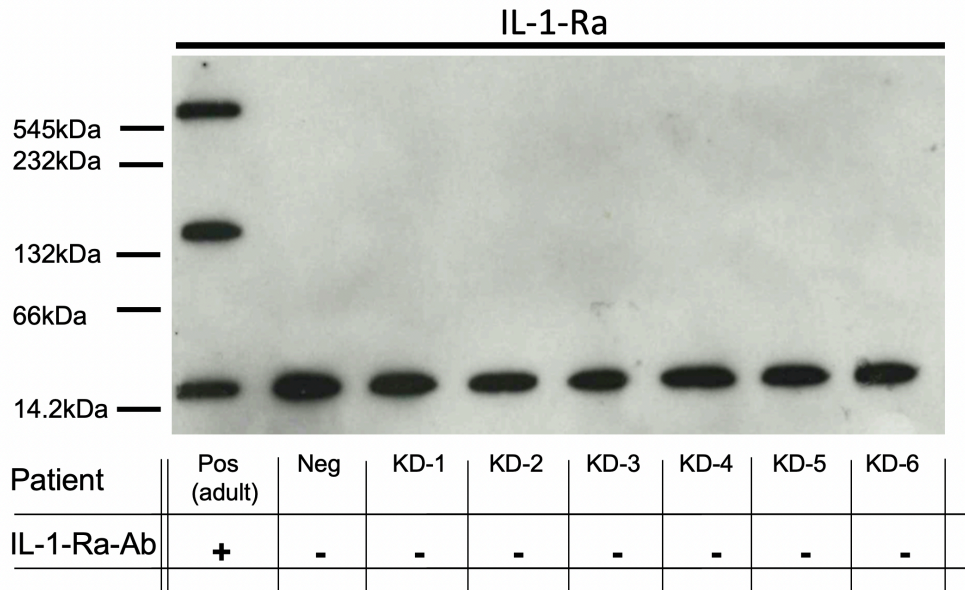

E) IEF and native gradients SDS PAGE and Western-blot of IL-1Ra in patients with Kawasaki disease (KD; D, n=6).

### Test details for comparison of IL-1Ra plasma level

| Dunnett's T3 multiple comparisons test                                          | Mean Diff, | 95.00% CI of diff, | Below threshold? | Summary     | ed P Value |     |       |       |  |
|---------------------------------------------------------------------------------|------------|--------------------|------------------|-------------|------------|-----|-------|-------|--|
| <b>MIS-C</b> (IL-1-RA-Ab <b>neg</b> ) vs. <b>MIS-C</b> (IL-1-RA-Ab <b>pos</b> ) | 1466       | 1186 to 1747       | Yes              | ****        | <0.0001    | A-B |       |       |  |
| <b>MIS-C</b> (IL-1-RA-Ab <b>neg</b> ) vs. KD                                    | 708.1      | 144.5 to 1272      | Yes              | **          | 0.0068     | A-C |       |       |  |
| <b>MIS-C</b> (IL-1-RA-Ab <b>neg</b> ) vs. sJIA                                  | 467.6      | 51.81 to 883.3     | Yes              | *           | 0.0108     | A-D |       |       |  |
| <b>MIS-C</b> (IL-1-RA-Ab <b>pos</b> ) vs. KD                                    | -758.2     | -1361 to -155.6    | Yes              | **          | 0.0094     | B-C |       |       |  |
| <b>MIS-C</b> (IL-1-RA-Ab <b>pos</b> ) vs. sJIA                                  | -998.7     | -1384 to -613.0    | Yes              | ****        | <0.0001    | B-D |       |       |  |
| KD vs. sJIA                                                                     | -240.6     | -820.6 to 339.5    | No               | ns          | 0.6172     | C-D |       |       |  |
| Test details                                                                    | Mean 1     | Mean 2             | Mean Diff,       | SE of diff, | n1         | n2  | t     | DF    |  |
| <b>MIS-C</b> (IL-1-RA-Ab <b>neg</b> ) vs. <b>MIS-C</b> (IL-1-RA-Ab <b>pos</b> ) | 1746.0     | 279.4              | 1466             | 72.65       | 8          | 13  | 20.18 | 7733  |  |
| <b>MIS-C</b> (IL-1-RA-Ab <b>neg</b> ) vs. KD                                    | 1746.0     | 1038               | 708.1            | 146.0       | 8          | 6   | 4.85  | 8.01  |  |
| <b>MIS-C</b> (IL-1-RA-Ab <b>neg</b> ) vs. sJIA                                  | 1746.0     | 1278               | 467.6            | 124.3       | 8          | 10  | 3.76  | 15.21 |  |
| <b>MIS-C</b> (IL-1-RA-Ab <b>pos</b> ) vs. KD                                    | 279.4      | 1038               | -758.2           | 128.7       | 13         | 6   | 5.891 | 5.16  |  |
| <b>MIS-C</b> (IL-1-RA-Ab <b>pos</b> ) vs. sJIA                                  | 279.4      | 1278               | -998.7           | 103.5       | 13         | 10  | 9.654 | 9.45  |  |
| KD vs. sJIA                                                                     | 1038       | 1278               | -240.6           | 163.5       | 6          | 10  | 1.471 | 10.96 |  |

### Test details for comparison of IL-1Ra plasma level (with exclusion of 2 MIS-C cases, who had received IVIGs)

| Dunnett's T3 multiple comparisons test                                          | Mean Diff, | 95.00% CI of diff, | Below threshold? | Summary     | ed P Value |     |       |       |  |
|---------------------------------------------------------------------------------|------------|--------------------|------------------|-------------|------------|-----|-------|-------|--|
| <b>MIS-C</b> (IL-1-RA-Ab <b>neg</b> ) vs. <b>MIS-C</b> (IL-1-RA-Ab <b>pos</b> ) | 1471       | 1188 to 1754       | Yes              | ****        | <0.0001    | A-B |       |       |  |
| <b>MIS-C</b> (IL-1-RA-Ab <b>neg</b> ) vs. KD                                    | 708.1      | 144.5 to 1272      | Yes              | **          | 0.0068     | A-C |       |       |  |
| <b>MIS-C</b> (IL-1-RA-Ab <b>neg</b> ) vs. sJIA                                  | 467.6      | 51.81 to 883.3     | Yes              | *           | 0.0108     | A-D |       |       |  |
| <b>MIS-C</b> (IL-1-RA-Ab <b>pos</b> ) vs. KD                                    | -762.6     | -1367 to -158.3    | Yes              | **          | 0.0093     | B-C |       |       |  |
| <b>MIS-C</b> (IL-1-RA-Ab <b>pos</b> ) vs. sJIA                                  | -1003      | -1380 to -626.2    | Yes              | ****        | <0.0001    | B-D |       |       |  |
| KD vs. sJIA                                                                     | -240.6     | -820.6 to 339.5    | No               | ns          | 0.6172     | C-D |       |       |  |
| Test details                                                                    | Mean 1     | Mean 2             | Mean Diff,       | SE of diff, | n1         | n2  | t     | DF    |  |
| <b>MIS-C</b> (IL-1-RA-Ab <b>neg</b> ) vs. <b>MIS-C</b> (IL-1-RA-Ab <b>pos</b> ) | 1746       | 275.0              | 1471             | 73.31       | 8          | 11  | 20.06 | 8.002 |  |
| <b>MIS-C</b> (IL-1-RA-Ab <b>neg</b> ) vs. KD                                    | 1746       | 1038               | 708.1            | 146.0       | 8          | 6   | 4.85  | 8.01  |  |
| <b>MIS-C</b> (IL-1-RA-Ab <b>neg</b> ) vs. sJIA                                  | 1746       | 1278               | 467.6            | 124.3       | 8          | 10  | 3.76  | 15.21 |  |
| <b>MIS-C</b> (IL-1-RA-Ab <b>pos</b> ) vs. KD                                    | 275.0      | 1038               | -762.6           | 129.1       | 11         | 6   | 5.908 | 5.22  |  |
| <b>MIS-C</b> (IL-1-RA-Ab <b>pos</b> ) vs. sJIA                                  | 275.0      | 1278               | -1003            | 103.9       | 11         | 10  | 9.653 | 9.615 |  |
| KD vs. sJIA                                                                     | 1038       | 1278               | -240.6           | 163.5       | 6          | 10  | 1.471 | 10.96 |  |

**Kits and Antibodies**

| <b>Product/Kit</b>                                              | <b>Source/Provider</b>                                                               | <b>City</b>      | <b>Country</b> |
|-----------------------------------------------------------------|--------------------------------------------------------------------------------------|------------------|----------------|
| episomal one-vector system with cytomegalovirus promoter (pSFI) | Bornkamm GW et al.,<br>GSF-Institut für Klinische Molekularbiologie und Tumorgenetik | München          | Germany        |
| Nunc MaxiSorp plates                                            | eBioscience                                                                          | Frankfurt a.M.   | Germany        |
| murine anti-FLAG (DYKDDDDK) monoclonal antibody F3165           | Sigma-Aldrich                                                                        | München          | Germany        |
| biotinylated goat antihuman heavy and light chain IgG           | Dianova                                                                              | Hamburg          | Germany        |
| sheep antihuman IgG1, IgG2, IgG3, and IgG4                      | Binding Site Group                                                                   | Birmingham       | UK             |
| goat antihuman IgM                                              | Dianova                                                                              | Hamburg          | Germany        |
| goat antihuman IgA                                              | Dianova                                                                              | Hamburg          | Germany        |
| Peroxidase-labelled streptavidin                                | Roche Applied Science                                                                | Indianapolis, IN | USA            |
| Anti Clostridium tetani tetanus toxin IgG ELISA #82861          | Argio Biolaboratories                                                                | Hsinchu City     | Taiwan         |
| FastAP Thermosensitive Alkaline Phosphatase #EF0651             | Fermentas/VWR                                                                        | Darmstadt        | Germany        |
| IL1RA Human ELISA Kit; #BMS2080                                 | Thermo Fisher Scientific                                                             | Waltham, MA      | USA            |
| PGRN ELISA kit; AG-45A-0018YEK-KI01                             | AdipoGen                                                                             | Incheon          | South Korea    |
| HEK-Blue IL-1 $\beta$ Cells; #hkb-il1bv2                        | Invivogen                                                                            | San Diego, CA    | USA            |
| QUANTI-Blue; #hkb-il1bv2                                        | Invivogen                                                                            | San Diego, CA    | USA            |
| Recombinant IL-1Ra; #PPT-AF-2000-01RA                           | Biozol                                                                               | Eching           | Germany        |
| rabbit anti human IL-1Ra antibody; #ABIN2856394                 | antibodies-online                                                                    | Aachen           | Germany        |
| recombinant SLP2 antibody at 5 $\mu$ g/mL #ab191883             | Abcam                                                                                | Cambridge        | UK             |
| IL-1 $\beta$ ; #PPT-200-01B; Biozol                             | Biozol                                                                               | Eching           | Germany        |
| TNF- $\alpha$ ; #PPT-300-01A                                    | Biozol                                                                               | Eching           | Germany        |
